1 ***Discoidin domain receptor* regulates ensheathment, survival, and caliber of peripheral**  
2 **axons**

3 Megan M. Corty<sup>1</sup>, Alexandria P. Lassetter<sup>1</sup>, Jo Q. Hill<sup>2</sup>, Amy E. Sheehan<sup>1</sup>, F. Javier Bernardo-  
4 Garcia<sup>2</sup>, Graeme W. Davis<sup>2</sup>, Sue A. Aicher<sup>3</sup>, Marc R. Freeman<sup>1</sup>

5 <sup>1</sup>Vollum Institute, Oregon Health & Science University, Portland, OR, 97239, USA

6 <sup>2</sup> Department of Biochemistry and Biophysics, Kavli Institute for Fundamental Neuroscience,  
7 University of California, San Francisco, San Francisco, CA 94158, USA

8 <sup>3</sup>Department of Chemical Physiology & Biochemistry, Oregon Health & Science University,  
9 97239, Portland, OR, USA

10 Correspondence: [freemmar@ohsu.edu](mailto:freemmar@ohsu.edu)

11 Key Words: wrapping glia, *Drosophila*, Remak Schwann cell, Multiplexin, axon ensheathment

12

13

## 14 **Abstract**

15           Invertebrate axons and small caliber axons in mammalian peripheral nerves are  
16 unmyelinated but still ensheathed by glia. How this type of ensheathment is controlled and its  
17 roles in supporting neuronal function remain unclear. We performed an *in vivo* RNAi screen in  
18 *Drosophila* to identify glial genes required for axon ensheathment and identified the conserved  
19 receptor tyrosine kinase Discoidin domain receptor (Ddr). In larval peripheral nerves, loss of  
20 Ddr resulted in incomplete ensheathment of axons. We found a strong dominant genetic  
21 interaction between *Ddr* and the fly type XV/XVIII collagen *Multiplexin (Mp)*, suggesting Ddr  
22 functions as a collagen receptor to drive wrapping of axons during development. Surprisingly,  
23 while ablation of glia that wrap axons severely impaired larval motor behavior, incomplete  
24 wrapping in *Ddr* mutants was sufficient to support basic circuit function. In adult nerves, loss of  
25 Ddr from glia decreased long-term survival of sensory neurons and significantly reduced axon  
26 caliber without overtly affecting ensheathment. Our data establish a crucial role for non-  
27 myelinating glia in peripheral nerve development and function across the lifespan, and identify  
28 Ddr as a key regulator of axon-glia interactions during ensheathment.

29

## 30 **Introduction**

31           In complex nervous systems, specialized glial cells ensheath long axons, and this  
32 wrapping can take many forms. Myelination is the most studied type of ensheathment, but  
33 unmyelinated axons make up the majority (~70%) of axons in human peripheral nerves (Ochoa  
34 and Mair, 1969; Schmalbruch, 1986). Vertebrate Remak Schwann cells ensheath and separate  
35 unmyelinated axons from one another. These small caliber axons include many types of sensory

36 neuron axons, including nociceptive c-fibers and autonomic axons (Griffin and Thompson,  
37 2008). Remak Schwann cells are positioned to mediate fundamental aspects of nerve  
38 development and sensory biology, and be important modulators of neurological conditions  
39 affecting the peripheral nervous system (PNS) including peripheral neuropathies and nerve  
40 injuries. However, Remak Schwann cells have remained understudied, in part due to a lack of  
41 selective genetic tools to specifically target this population.

42         In *Drosophila*, axons in peripheral nerves are ensheathed by specialized wrapping glia in  
43 a manner analogous to vertebrate Remak bundles (Figure 1A-B). *Drosophila* larval abdominal  
44 nerves project out of the ventral nerve cord in each segment and contain both motor and sensory  
45 neuron axons surrounded by multiple glial layers: the outermost perineurial glia, then  
46 subperineurial glia, and finally axon-associated wrapping glia (Hilchen et al., 2013; Matzat et al.,  
47 2015; Stork et al., 2008)(Figure 1A,B). Wrapping is progressive throughout larval life. In  
48 embryos, axons are initially tightly fasciculated without intervening glial processes. Wrapping  
49 progresses such that by third instar axons are wrapped either individually or in small bundles by  
50 wrapping glia membrane (Figure 1B, C) (Matzat et al., 2015). This process mirrors vertebrate  
51 nerve development when Schwann cells perform radial sorting of axons that are initially tightly  
52 fasciculated (Monk et al., 2015) and a growing body of evidence that demonstrates a high degree  
53 of cellular and molecular conservation between ensheathment mechanisms in *Drosophila* and  
54 vertebrates (Ghosh et al., 2013; Matzat et al., 2015; Mukherjee et al., 2020; Petley-Ragan et al.,  
55 2016; Xie and Auld, 2011). This Remak-like type of multi-axonal ensheathment is thought to  
56 represent an ancient form of axon-glial association, and the emerging cellular and molecular  
57 conservation of multiple aspects of peripheral nerve biology make *Drosophila* wrapping glia a  
58 promising model to study non-myelinating ensheathment *in vivo*.

59           Beyond simply insulating individual axons, glia that ensheath axons also regulate  
60 neuronal development, maintenance, and function throughout an animal's lifespan. Myelination  
61 can alter the distribution of axonal proteins, increase axon caliber, and is important for trophic  
62 and metabolic support of long axons, though the precise mechanisms by which myelinating glia  
63 perform all of these functions remain incompletely understood (Nave, 2010). Recent work  
64 supports the notion that Remak Schwann cells play similar important roles: perturbation of  
65 Schwann cell metabolism results in axon degeneration, with small caliber, Remak-ensheathed  
66 axons degenerating earlier than myelinated ones (Beirowski et al., 2014). Although Remak  
67 Schwann cells were not targeted selectively, these observations support the notion that  
68 unmyelinated axons are also reliant on glial support.

69           Here we take advantage of *Drosophila* wrapping glia as a model to identify new  
70 molecular regulators of glial ensheathment and support of axons. Through an RNAi-based  
71 screen, we identify *Discoidin domain receptor (Ddr)* as crucial for glial ensheathment in larval  
72 nerves. We demonstrate that wrapping glia are essential for normal nerve function and behavior  
73 by developing a new Split-Gal4 intersectional driver to genetically ablate larval wrapping glia,  
74 which results in severely impaired crawling behavior. Surprisingly, while loss of *Ddr* results in  
75 incomplete wrapping, it did not result in overt effects on behavior, arguing that even partial  
76 ensheathment is sufficient to support normal nerve function. In adult nerves, loss of *Ddr* results  
77 in reduced long-term survival of peripheral sensory neurons and reduced axon caliber without  
78 affecting ensheathment. *Ddr* is therefore a new glial regulator of axon caliber *in vivo*. Finally,  
79 we identify the collagen multiplexin (*Mp*) as a potential ligand for *Ddr* in driving wrapping  
80 during development, suggesting that *Ddr*-collagen interactions are critical regulators of axon  
81 ensheathment and glial support of neurons.

## FIGURE 1

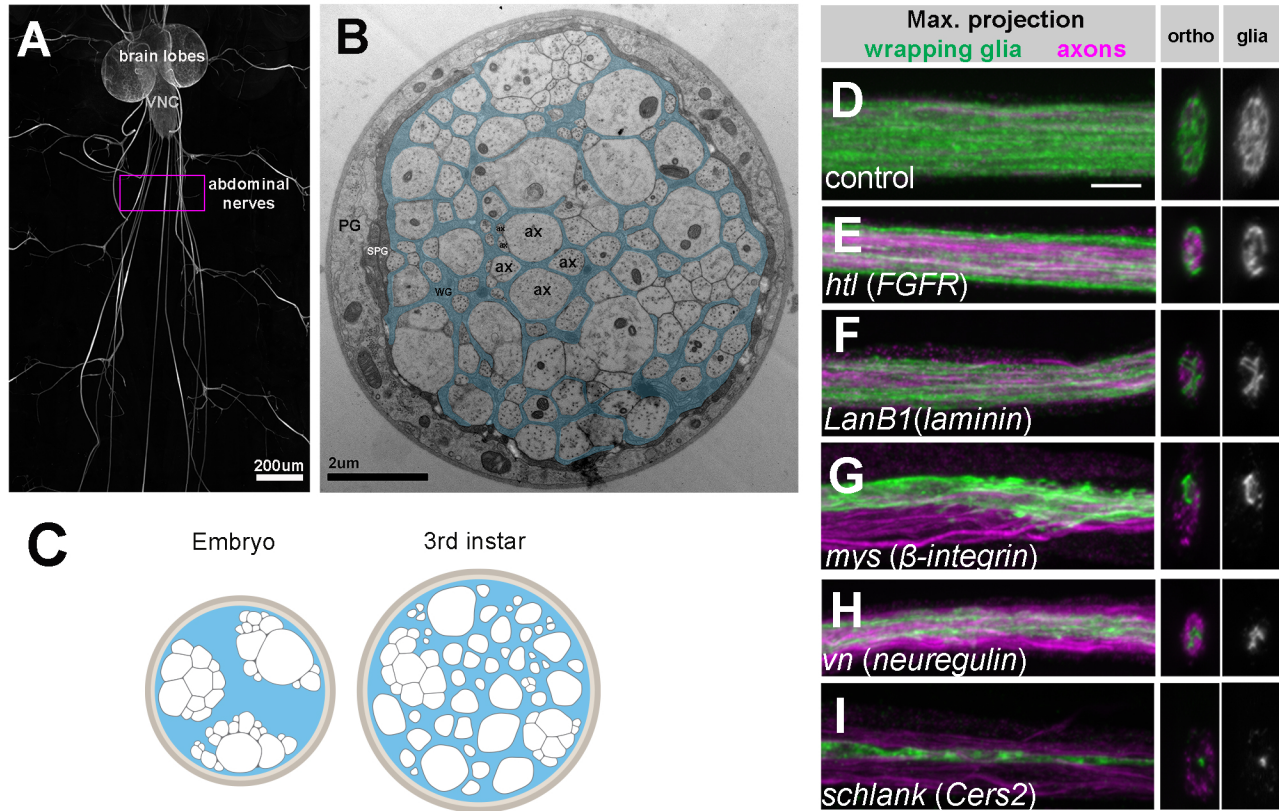

**Figure 1: *Drosophila* wrapping glia are a model of multi-axonal ensheathment**

(A) Confocal image showing a 3<sup>rd</sup> instar larval nervous system including the brain, ventral nerve cord (VNC), and peripheral nerves as labeled in a *nrv2-Gal4>UASmCD8:GFP* animal. This driver labels wrapping glia in the nerves as well as some subtypes of CNS glia in the brain and VNC. Boxed region corresponds to the approximate area imaged for glial morphology analysis. (B) TEM cross-section of a third instar larval nerve. Light, round profiles of larval axons (ax) are surrounded by darker (pseudo-colored cyan) wrapping glia. Subperineurial (SPG) and perineurial glia (PG; not colored) form the outer layers of the nerve, which is coated by a neural lamella of ECM proteins. (C) Schematic representation of larval nerve cross sections at hatching and 3<sup>rd</sup> instar stages illustrating that wrapping is progressive over larval development. (D-H) RNAi against genes with known roles in wrapping glia and vertebrate glia development results in visible morphological defects at the light level. Wrapping glia are labeled with *myr:tdTomato* driven by *nrv2-Gal4* (pseudo-colored green). A subset of sensory axons are labeled with anti-Futsch (magenta). A maximum confocal projection of the nerve is shown in the left panel. The ortho panel shows the nerve cross section, and the glia channel is the isolated wrapping glial channel in cross section. Scale bar 5 $\mu$ m. (D) Control nerves show fairly uniform, honeycomb-like glia membrane coverage of the nerve cross section. (E) Wrapping glial knockdown of *heartless*, an FGF Receptor homolog, shows incomplete glial coverage of the nerve cross section. (F) Knockdown of *lanB1*, a laminin homolog, causes impaired cross section coverage. (G) Knockdown of the  $\beta$ -integrin homolog *mysospheroid* causes highly abnormal glia morphology where glia fail to cover the entire nerve. (H) Knockdown of the neuregulin homolog, *vein*, results in impaired glia coverage of the nerve cross section. (I) Knockdown of *schlank*, a Ceramide Synthetase-2 homolog, results in thin stringy glia that does not appear to wrap axons at all.

82

83 RESULTS

84 **Morphology based RNAi screen identifies *Ddr* as a regulator of wrapping glia development**

85 To identify genes that are required in glia for normal ensheathment of axons, we  
86 conducted a morphology based RNAi screen to systematically knock down genes in wrapping  
87 glia and look for changes in glial morphology in third instar larval nerves (Matzat et al. 2015;  
88 Stork et al. 2008). To visualize and manipulate wrapping glia, we used the well-established  
89 *nrv2-Gal4* driver line which, within the PNS, is strongly and exclusively expressed in wrapping  
90 glia (Stork et al., 2008; Xie and Auld, 2011). We expressed a membrane bound marker (*UAS-*  
91 *myr:tdTomato*) to visualize wrapping glia morphology and *UAS-RNAi* constructs from the  
92 Vienna *Drosophila* Resource Collection to knock down genes selectively in wrapping glia  
93 throughout development. In total, we screened a collection of ~2000 RNAi lines, which comprise  
94 the majority of transmembrane, secreted, and signaling proteins in the fly genome and included  
95 the fly homologs of ~200 genes strongly expressed in the developing mouse oligodendrocyte  
96 lineage based on available RNA-seq data (Zhang et al., 2014).

97 Using spinning disk confocal microscopy and examination of nerve cross sections, we  
98 found that wild type wrapping glia morphology in third instar larvae includes membrane  
99 coverage throughout the interior of the nerve with small, regularly spaced gaps like a tight  
100 honeycomb (Figure 1D and Figure 2—figure supplement 1A,B). As a positive control for our  
101 screen, we knocked down genes previously shown to be involved in wrapping glia development  
102 including the neuregulin homolog *vein*, the FGF receptor *heartless*, integrin receptors, laminin,  
103 and the ceramide synthetase gene, *schlank* (Franzdóttir et al., 2009; Ghosh et al., 2013;  
104 Kottmeier et al., 2020; Matzat et al., 2015; Petley-Ragan et al., 2016; Xie and Auld, 2011), all of

105 which resulted in easily identifiable defects in axon ensheathment using confocal microscopy  
106 (Figure 1E-I). Each of these genes have homologs that have been implicated in oligodendrocyte  
107 and/or Schwann cell development, further arguing for strong molecular conservation among both  
108 vertebrate and invertebrate axonal ensheathment mechanisms (Barros et al., 2009; Feltri et al.,  
109 2002; Furusho et al., 2009; Lyons et al., 2005; Michailov et al., 2004; Pereira et al., 2009;  
110 Stassart et al., 2013; Taveggia et al., 2005; Yu et al., 2009).

111         Among potential hits whose function had not previously been studied in either vertebrate  
112 or invertebrate glia was the *Discoidin domain receptor (Ddr)* gene (Figure 2A). Knocking down  
113 *Ddr* using two independent RNAi constructs led to altered wrapping glia morphology with the  
114 nerve cross section incompletely covered by glial membrane, suggesting that axons were not  
115 properly wrapped when *Ddr* was knocked down (Figure 2B-D). *Drosophila Ddr* encodes a  
116 receptor tyrosine kinase homologous to vertebrate Ddr1 and Ddr2. In the mouse, Ddr1 is  
117 expressed in Schwann cells and the oligodendrocyte lineage (Franco-Pons et al., 2006; Gerber et  
118 al., 2021; Roig et al., 2010; Zhang et al., 2014), but direct roles for Ddr1 in regulating  
119 ensheathment of axons have not been reported. Thus, the results from our screen provide the  
120 first functional indication that this receptor could be involved in regulating axonal wrapping.

121

## 122 ***Ddr* mutants exhibit defects in axonal ensheathment**

123         To confirm that *Ddr* is involved in wrapping glia development, we created mutant alleles  
124 of *Ddr* using a CRISPR-Cas9 strategy. Briefly, using two gRNAs against widely spaced,  
125 adjacent exons, we generated fly stocks in which an ~11kb region of the *Ddr* coding region was  
126 excised near the 5' end (Figure 2A & 2H). We sequenced the resulting deletion lines to identify  
127 mutants that resulted in frame shift mutations and early stop codons. *Ddr* encodes two potential

## FIGURE 2

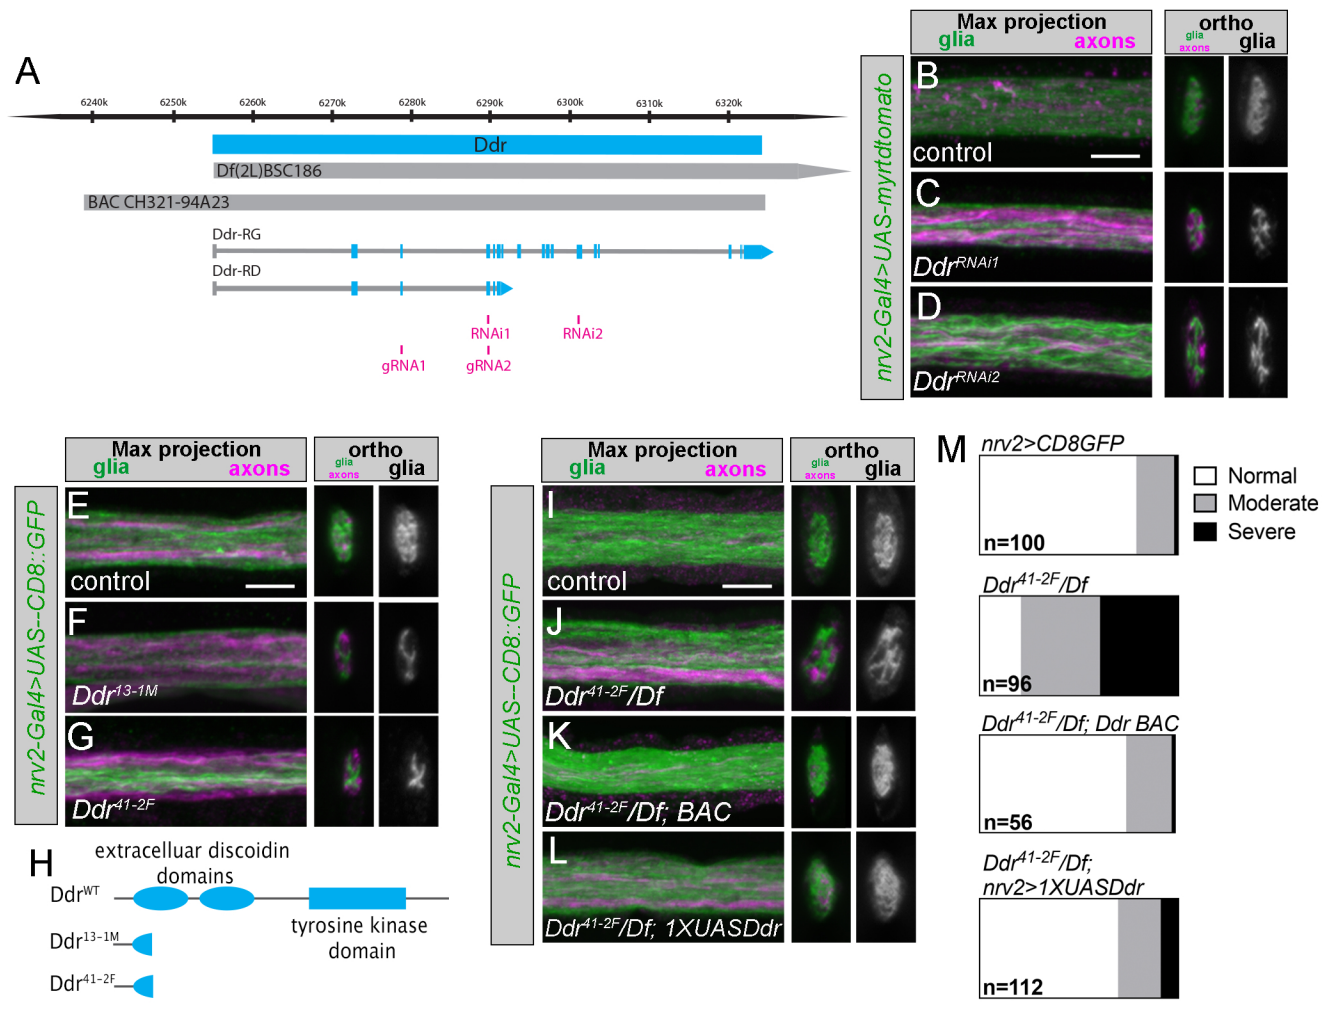

**Figure 2: Ddr is required for normal wrapping glia morphogenesis**

(A) Model of the *Ddr* genetic locus showing the coding region (cyan); the deficiency used in experiments: *Df(2L)BSC186*; the region that the rescue BAC covers; the location of the RNAi target regions (magenta); and locations of the guide RNAs used for the CRISPR-mediated mutagenesis (magenta). (B-D) Representative images of *Ddr* RNAi knockdown with 2 independent RNAi constructs. *Nrv2-Gal4* driven tdTomato is pseudocolored green. A subset of axons is labeled with anti-Futsch antibody (magenta). Compared to control nerves (B), RNAi conditions show large patches of the nerve cross section without glia membrane coverage (C,D). (E-G) Representative images of *Ddr* homozygous mutant experiments. Compared to control (E) both CRISPR mutant alleles show severe defective glia coverage in the nerve cross sections (F-G). (H) *Ddr* is a transmembrane receptor tyrosine kinase characterized by extracellular discoidin and discoidin-like domains and an intracellular tyrosine kinase domain. The mutant alleles generated by CRISPR-CAS9 result in a severely truncated peptide without any full domains. (I-L) Representative images of *Ddr* loss of function experiments. (I) *Nrv2-Gal4, UAS-CD8::GFP/+* was used to visualize glial morphology and is in the background of all conditions. (J) *Ddr<sup>41-2F</sup>/DfBSC186* (“*Ddr* mutant”) nerves show incomplete coverage of the nerve cross section. This example shows a “moderate” phenotype, more examples of moderate and severe phenotypes can be seen in Supplemental Figure S2A. (K) Introduction of a BAC transgene to resupply endogenous *Ddr* expression largely restores normal morphology. (L) Expression of a *1xUASDdr* construct in wrapping glia using *Nrv2-Gal4* similarly restores normal morphology. (M) Categorical scoring of nerve wrapping glia phenotypes. n= # of nerves scored (8-14 larvae per condition). Scale bars = 5 μm.



128 isoforms: a short isoform that is 380 amino acids and lacks both transmembrane and kinase  
129 domains, and a full-length isoform that encodes a 1054 amino acid protein. We identified two  
130 independent alleles that are predicted nulls, as they result in 150 amino acid (*Ddr<sup>I3-1M</sup>*) or 134  
131 amino acid (*Ddr<sup>41-2F</sup>*) long peptides lacking all known functional domains (Figure 2H). Both  
132 mutant alleles were homozygous viable and viable when placed in *trans* to large deficiencies that  
133 uncover the *Ddr* coding region. We analyzed the nerves of *Ddr* homozygous mutant animals  
134 using florescent confocal microscopy and found that wrapping glia morphology was impaired as  
135 we had observed in the wrapping glia-specific RNAi knockdown experiments (Figure 2E-G).  
136 We focused our loss of function analyses on using the combination of *Ddr<sup>41-2F</sup>* and *Df(2L)*  
137 *BSC186*, the shortest deficiency that still deletes the entire *Ddr* coding region (Figure 2A). We  
138 found that animals lacking any functional Ddr had impaired wrapping (Figure 2I-J, 2M; control:  
139 79% normal morphology; *Ddr/Df*: 21% normal morphology; see Figure 2—figure supplement 1  
140 for examples of categorical scoring). Introduction of a single copy of a BAC clone containing  
141 the entire *Ddr* locus and a ~17.4kb upstream region into the mutant strain largely restored normal  
142 wrapping morphology (Figure 2K, 2M; BAC rescue: 75% normal morphology), as did  
143 resupplying Ddr in wrapping glia via a *IxUAS-Ddr* construct driven by *nrv2-Gal4* (Figure 2L,  
144 2M; *IxUAS* rescue: 70% normal morphology). Higher level overexpression using a *5xUAS-Ddr*  
145 construct caused morphological defects in a control background that the *IxUAS-Ddr* construct  
146 did not, suggesting that Ddr levels may need to be tightly regulated to promote normal wrapping  
147 and morphological development (Figure 2—figure supplement 2). Together these results  
148 confirmed our RNAi results that Ddr is required cell autonomously in wrapping glia to regulate  
149 axon ensheathment.

150           While data from fluorescent images supported the notion that significant ensheathment  
151 defects resulted from loss of Ddr, we wanted to quantify more precisely how wrapping was  
152 affected in Ddr mutants. We therefore analyzed nerves from control and *Ddr* mutant animals  
153 using transmission electron microscopy (TEM) and used the “wrapping index” (WI) metric to  
154 quantify ensheathment defects (Matzat et al., 2015). WI is equal to the number of individually  
155 wrapped axons plus the number of small bundles of axons, divided by the total number of axonal  
156 profiles and is expressed as a percentage. In control condition nerves, wrapping glia membrane  
157 separated axons in small bundles or individually (Figure 3A-B). The average WI in control  
158 conditions was ~21% (Figure 3F: *nrν2* driver control: mean= 22.5%, n=26 nerves from 5 larvae,  
159 *w<sup>1118</sup>* control: mean= 21%, n=15 nerves from 3 larvae), consistent with previous reports (Matzat  
160 et al., 2015). We observed less separation of axons by wrapping glia membrane in Ddr  
161 conditions (Figure 3C-D), and this was reflected in both *Ddr<sup>41-2F</sup>* homozygous and *Ddr<sup>41-</sup>*  
162 *<sup>2F</sup>/Df(2L)BSC186* conditions showing a significant decrease in wrapping index (Figure 3F:  
163 *Ddr/Ddr* mean=14.8%, n=30 nerves from 4 larvae, p=0.0006 compared to *nrν2* control;  
164 *Ddr/Df(2L)BSC186*: mean= 11.9%, n=33 nerves from 4 larvae, p<0.0001 compared to *nrν2*  
165 control, one-way ANOVA with Dunnett’s multiple comparisons). These data confirm that loss of  
166 Ddr impairs axonal wrapping during development.

167           To determine whether loss of Ddr specifically affected wrapping glia or more grossly  
168 disrupted the morphology of the nerve, we also assessed the other glial and axonal populations  
169 within the nerves of Ddr mutants. We did not observe any changes in either subperineurial or  
170 perineurial glia in TEM sections in the mutant conditions, nor differences in the total number of  
171 axon profiles observed (Figure 3—figure supplement 1), suggesting that overall nerve assembly

## FIGURE 3

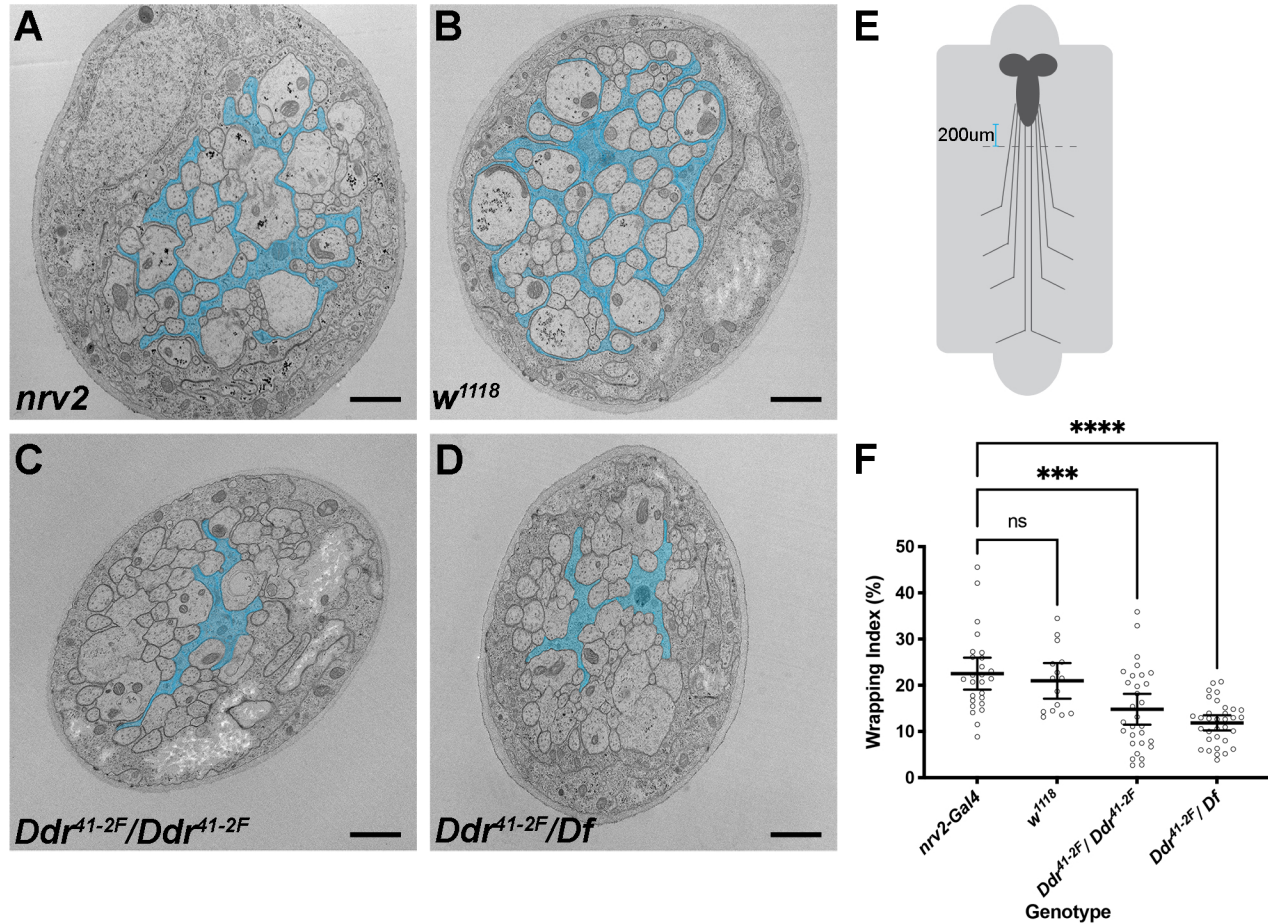

**Figure 3: Loss of *Ddr* impairs axon ensheathment in larval nerves**

(A) TEM cross section of an abdominal nerve from a control *nrv2-Gal4, UAS-CD8:GFP/+* 3<sup>rd</sup> instar larvae. Wrapping glia membrane is pseudocolored cyan. (B) TEM cross section of an abdominal nerve from a control *w<sup>1118</sup>* 3<sup>rd</sup> instar larva. (C) TEM cross section of an abdominal nerve from a *Ddr<sup>41-2F</sup>* homozygous mutant animal (*Ddr<sup>41-2F</sup>/Ddr<sup>41-2F</sup>; nrv2-Gal4, UAS-CD8:GFP/+*). (D) TEM cross section of an abdominal nerve from a *Ddr* loss of function animal (*Ddr<sup>41-2F</sup>/Df(2L)BSC186; nrv2-Gal, UAS-CD8:GFP/+*). (E) Schematic of larval fillets prepped for TEM. Sections for analysis are collected ~200um from the distal tip of the VNC. (F) Quantification using the wrapping index (WI) metric. Wrapping index was reduced in *Ddr* loss of function conditions compared to control conditions in larval nerves. *Nrv2-Gal4, UAS-mCD8:GFP/+* controls (WI: 22.5%, n= 26 nerves, 5 larvae); *w<sup>1118</sup>* wildtype background strain (WI: 21%, n=15 nerves, 3 larvae, p=0.9546); *Ddr<sup>-/-</sup>* (WI: 14.8%, n= 30 nerves, 4 larvae, p=0.0006); *Ddr/Df* (WI: 11.9%,n=33 nerves, 4 larvae, p<0.0001); One-way ANOVA with Dunnett's multiple comparisons against *Nrv2-Gal4*. Error bars: 95% Confidence interval. Scale bars = 1µm

172 was relatively normal. Therefore loss of *Ddr* seems to specifically alter wrapping without  
173 disrupting nerve morphology.

174

### 175 **Incomplete ensheathment of axons is not sufficient to alter crawling behaviors**

176 We next sought to determine whether a decrease in multi-axonal ensheathment might  
177 impact neuronal health and function. Larval nerves are mixed nerves that contain both the motor  
178 and sensory axons that together mediate larval crawling behavior. To see if basic locomotion was  
179 affected when normal axonal ensheathment was impaired, we assayed larval crawling behavior  
180 in *Ddr* mutant third instar larvae by monitoring crawling on a non-nutritive agar surface using  
181 the FIMTracker system (Risse et al., 2017). Comparing overall distance travelled over a one  
182 minute period, we did not see any significant effects on basic crawling behavior between control  
183 and *Ddr* mutant larvae (Figure 4A-B). One interpretation of these results is that wrapping is  
184 completely dispensable, at least for basic crawling behaviors. Alternatively, it is possible that  
185 even the incomplete wrapping observed in *Ddr* mutants is sufficient to support neuronal function  
186 and this basic behavior over the ~5 day period of larval life.

187

### 188 **Genetic ablation of wrapping glia impairs larval crawling**

189 To further distinguish between these possibilities, we sought to ablate wrapping glia  
190 entirely. These experiments required a Gal4 driver that would selectively drive expression  
191 exclusively in wrapping glia. Although *Nrv2-gal4* is specific to wrapping glia in the PNS, it does  
192 drive expression in some subtypes of CNS glia which would complicate the interpretation of any  
193 functional ablation experiments. To generate a clean wrapping glia specific driver line, we turned  
194 to a Split-Gal4 intersectional strategy (Luan et al., 2006). First, we created a *nrv2-Gal4<sup>DBD</sup>*

## FIGURE 4

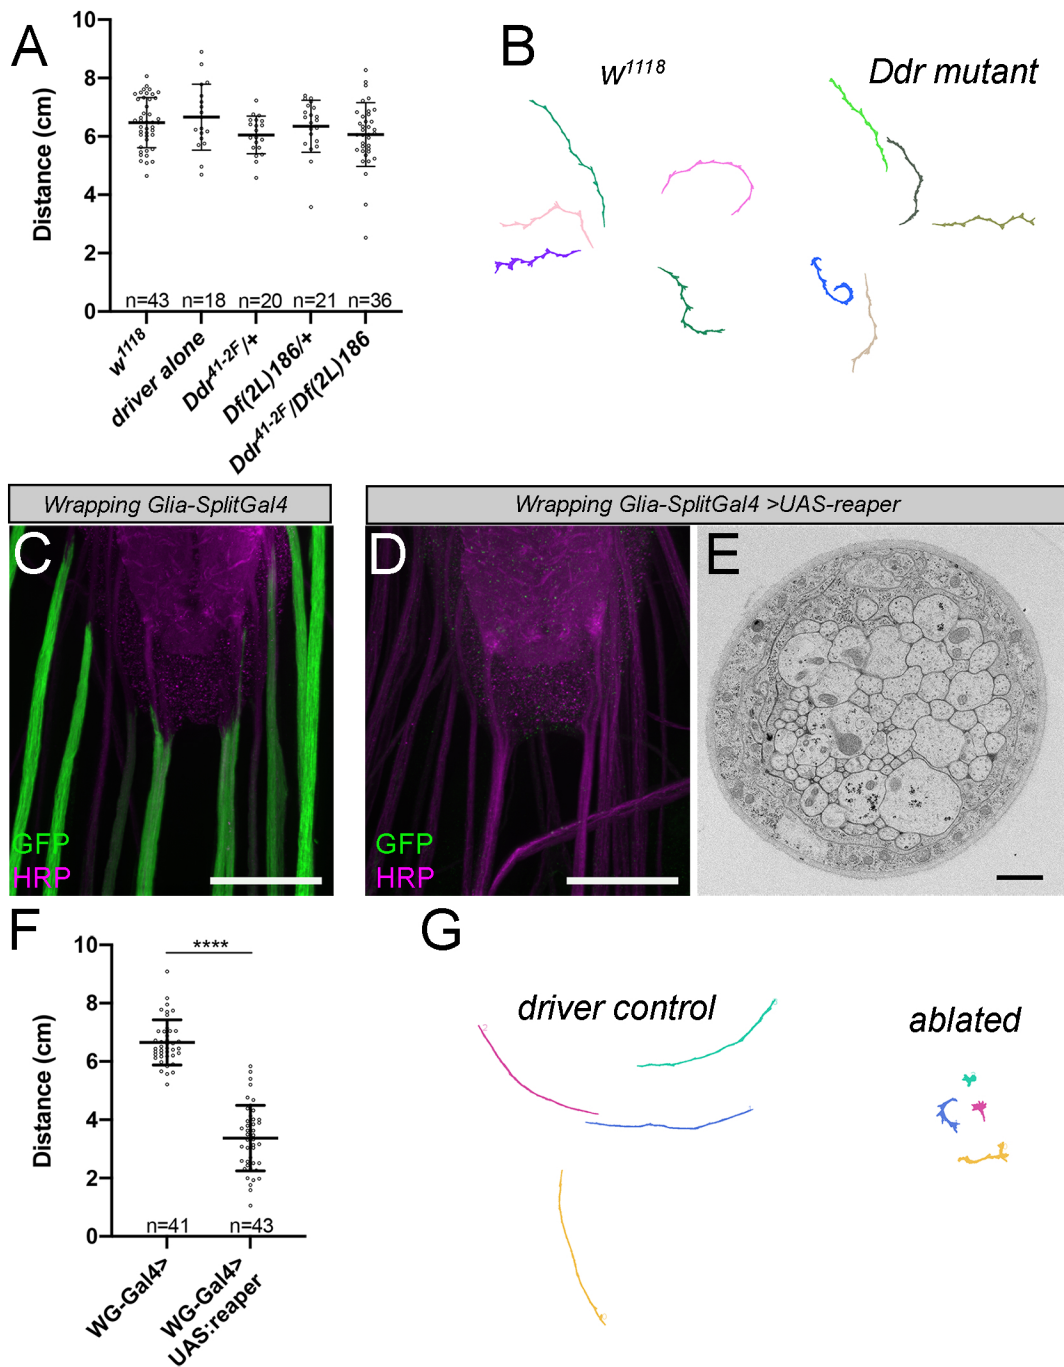

### Figure 4: Genetic ablation of wrapping glia impairs larval crawling behavior.

(A) Larval crawling, as measured by distance travelled per minute is not impaired in *Ddr* mutant animals compared to control conditions. One-way ANOVA with Tukey's multiple comparisons, no significant differences between any conditions.  $n = \#$  of larvae/condition. (B) Representative crawling paths from control and *Ddr* mutant larvae. (C) Expression pattern of *WG-Split-Gal4* driving *UAS-CD8:GFP* (green). Magenta is an HRP counterstain which labels neuronal membranes. Scale bar, 50 $\mu$ m. (D) Representative image of a 3<sup>rd</sup> instar larvae in which wrapping glia have been genetically ablated. Note the lack of GFP staining along the nerves. Scale bar 50 $\mu$ m. (E) TEM image of a nerve cross section from a larva whose wrapping glia has been ablated. All of the axons remain in contact with each other without intervening glial membrane. Scale bar 1 $\mu$ m (F) Larval crawling behavior is impaired when wrapping glia are ablated. Unpaired t-test,  $p < 0.0001$ .  $n = \#$  of larvae/condition. (G) Representative crawling paths of control and ablated larvae. The paths from the ablated larvae are shorter and show increased turning, stalling, and reversals. Error bars: standard deviation

195 construct. This line is capable of driving expression of the DNA binding domain of GAL4 in  
196 wrapping glia, cortex glia, ensheathing glia, and astrocytes (Coutinho-Budd et al., 2017). We  
197 then identified a line from the InSite collection (*InSite0117-Gal4*) that robustly labeled wrapping  
198 glia and a subset of neurons (Figure 4—figure supplement 1). We converted *Insite0117-Gal4* to  
199 *Insite0117-GAL4<sup>VP16AD</sup>* line using the InSite method to swap the domains via genetic crosses  
200 (Gohl et al., 2011). In conjunction with *Nrv2-Gal4<sup>DBD</sup>* this results in specific expression of UAS-  
201 transgenes only where the 2 hemi-drivers' expression overlaps—in wrapping glia. No other glia  
202 or neurons were observed in the expression pattern (Figure 4C and Figure 4—figure supplement  
203 1). This combination of *nrv2-Gal4<sup>DBD</sup>* and *IT.0117-Gal4<sup>VP16AD</sup>* is referred to as *wrapping glia-*  
204 *Split Gal4 (WG-SplitGal4)*.

205 We used *WG-SplitGal4* to drive expression of *UAS-mCD8:GFP* and *UAS-reaper* to  
206 ablate wrapping glia. We observed nearly complete loss of larval wrapping glia cells in resulting  
207 progeny based on loss of both fluorescence and an independent wrapping glia nuclear marker  
208 that we had identified in the lab, Oaz (Figure 4D and Figure 4—figure supplements 2 and 3).  
209 To further confirm the ablation of wrapping glia, we examined the ultrastructure of nerves where  
210 wrapping glia were ablated. We saw tightly fasciculated axons without intervening glial  
211 membranes confirming that wrapping glia had been eliminated (Figure 4E). Only in a few nerves  
212 did we identify anything that might be remnants of wrapping glia. We did not observe any  
213 obvious ingrowth of the outer subperineurial or perineurial glia layers to potentially compensate  
214 for the loss of wrapping glia and ensheath axons. However, we did note that several nerves  
215 showed an abnormal hypertrophy of the outer perineurial glia layer (Figure 4—figure  
216 supplement 3). Surprisingly, when we counted the number of axon profiles in each nerve, we  
217 found fewer axonal profiles than the expected ~78 of A3-A7 nerves (*w<sup>1118</sup>* average= 77.4 axons;

218 WG-ablated average= 63 axons; Unpaired t-test  $p=0.0006$ ), indicating that axons (or entire  
219 neurons) might have died or not developed properly as a result of acute wrapping glia loss  
220 (Figure 4—figure supplement 3).

221 Using these tools, we then assayed for defects in crawling behavior and found that  
222 animals with ablated wrapping glia crawled significantly less than control animals (Figure 4F-G;  
223 mean distance travelled: driver control =  $6.65 \pm 0.77$ cm,  $n=41$  larvae, ablated =  $3.37 \pm 1.126$ cm,  
224  $n=43$ ;  $p<0.0001$  unpaired t-test). In performing the experiments, we also observed that larvae  
225 lacking wrapping glia had difficulty righting themselves when placed on their dorsal sides, and  
226 were observed to have abnormal postures and body bends, indicating a possible disruption of  
227 bilateral or intersegmental coordination caused by wrapping glia ablation. Together, these data  
228 demonstrate that wrapping glia are required in nerves for normal circuit function.

229

### 230 **Ensheathment of axons in an adult nerve is not impaired in *Ddr* mutants**

231 Unlike ablation of wrapping glia, incomplete wrapping caused by the loss of *Ddr* did not  
232 significantly affect behavior or neuronal survival during the short larval period (~5 days).  
233 However, since neuronal defects that are secondary to glial dysfunction can be age- or stress-  
234 related in vertebrate animals (Beirowski et al., 2014; Lappe-Siefke et al., 2003; Saab et al., 2016;  
235 Yin et al., 1998; Zöllner et al., 2008), we investigated whether *Ddr* and proper wrapping were  
236 required for longer term support of axon health and function. Because the larval period is short  
237 and defined, we turned our attention to an accessible adult peripheral nerve, the L1 sensory nerve  
238 in the adult wing.

239 Sensory bristles and campaniform sensilla along the wing's edge are innervated by  
240 peripheral sensory neurons located within the L1 wing vein. The axons of these neurons form the

241 L1 sensory nerve that projects into the thorax (Figure 5A). The organization of the nerve is  
242 reported to be similar to larval nerves, with axons ensheathed by wrapping glia (Neukomm et al.,  
243 2014). We developed a protocol to perform TEM on the adult wing to examine cross sections of  
244 the nerve. By imaging in the region distal to the fusing of the L3 nerve but proximal to the first  
245 sensory cell body along the anterior wing margin, we could reliably visualize all of the axons  
246 present in the L1 nerve (Figure 5A, dashed red box). In control nerves at 5 dpe, we were  
247 surprised to find that all axons appear to be completely separated from one another (Figure 5B),  
248 instead of persisting in tightly compacted small bundles as are observed in the larval nerves  
249 (compare to Figure 1B). When we examined *Ddr* mutant wings of the same age, we found no  
250 obvious defects in wrapping and axon separation between control and *Ddr* mutant wing nerves  
251 (Figure 5C-D), in contrast to the impaired wrapping we observed in *Ddr* mutant larval nerves.  
252 These data show that wrapping in the adult is more extensive than in larval nerves and seems to  
253 be completed during pupal stages or shortly after eclosion. Despite being more extensive and  
254 complete, wrapping in adult nerves does not strictly require Ddr. Ddr may be dispensable for  
255 wrapping in the adult, work redundantly with other molecules, or cause only a transient delay in  
256 wrapping that is rectified within a few days of eclosion.

257

### 258 **Loss of Ddr impairs the long-term survival of adult sensory neurons**

259 Despite having no obvious defects in axonal ensheathment, based on our observation of  
260 apparent neuronal loss in wrapping glia-ablated larvae, we wondered whether long-term neuronal  
261 health in the adult L1 wing nerve might be impacted by loss of Ddr from glia. To test this, we  
262 labeled the ~40 glutamatergic neurons in the wing nerve using the *QF2/QUAS* binary system  
263 (*VGlut-QF2; QUAS-6xGFP*) (Potter et al., 2010), while at the same time using *Repo-Gal4* to



## FIGURE 5

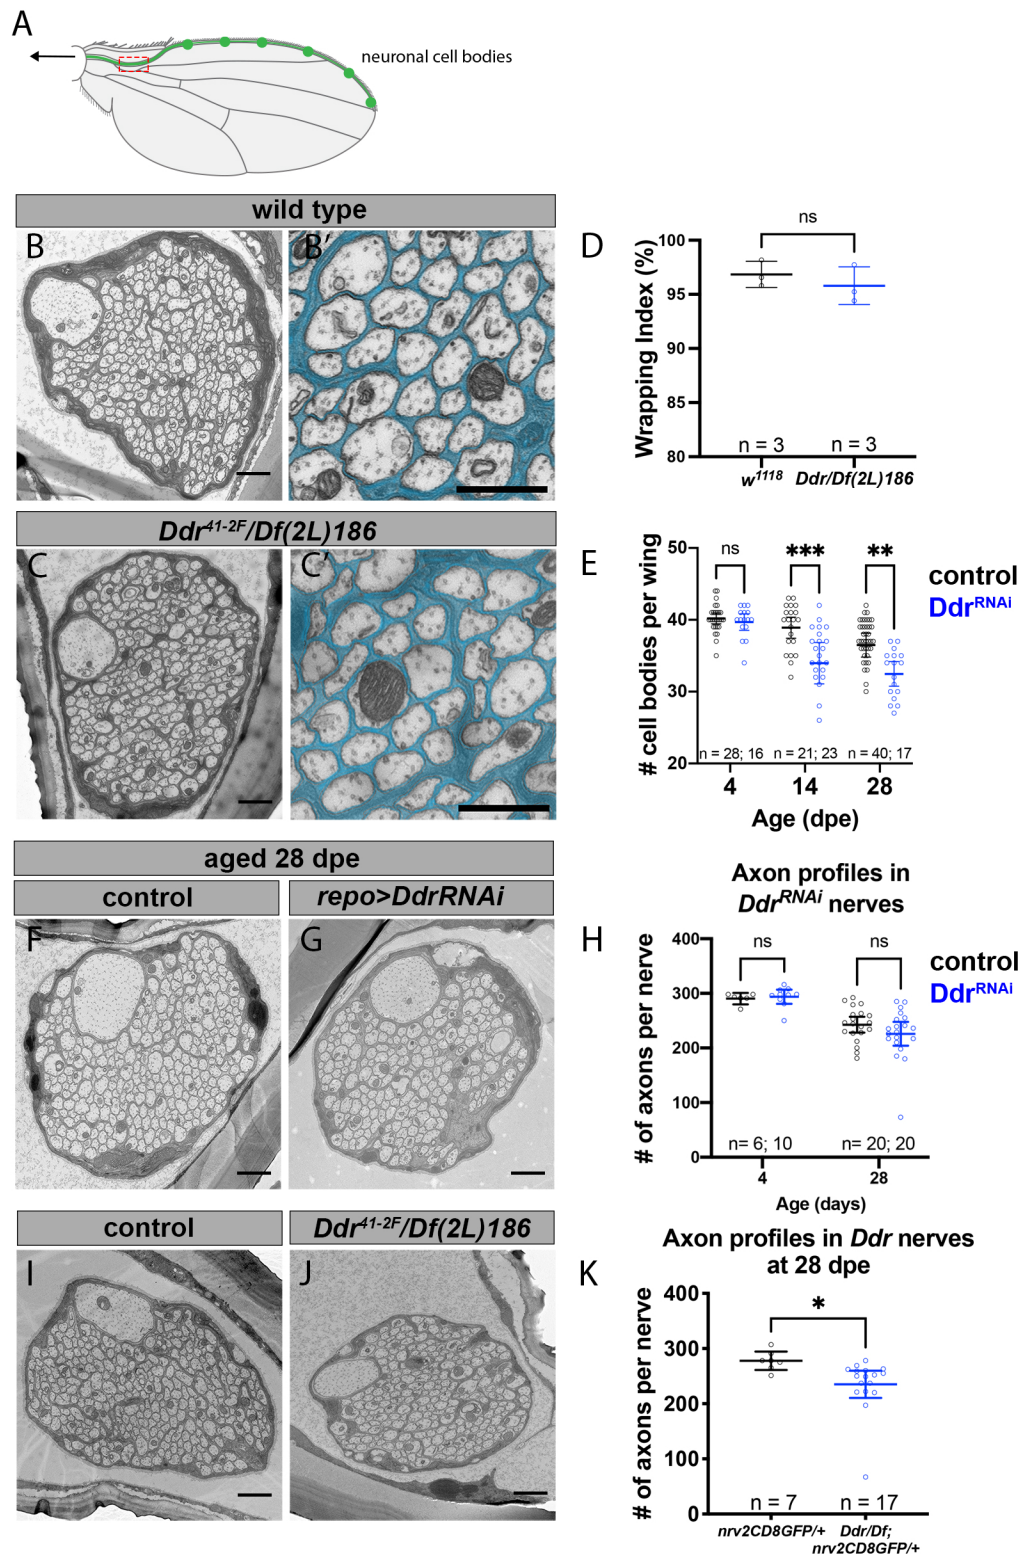

**Figure 5: Loss of Ddr impairs long-term neuronal survival without affecting wrapping in adult nerves**

(A) Schematic of the adult fly wing. The L1 vein lies along the anterior margin of the wing and contains ~280 sensory neuron cell bodies, a subset are depicted in green. The axons of these neurons coalesce to form the L1 sensory nerve which projects into the body towards the fly CNS. The TEM imaging window is shown in red. In this location axons from all of the L1 sensory neurons are present, allowing for quantifications. (cont. next page)

**Figure 5 (cont.)**

**(B)** Cross section TEM of the L1 nerve shows that axons are separated from each other by glial membranes by 5 dpe. **(B')** Magnified view from B with wrapping glia pseudocolored cyan. **(C)** Nerve morphology including wrapping is comparable in *Ddr* mutant nerves at this age, with axons separated and no obvious signs of impaired wrapping glia morphology. **(C')** Magnified view from C with wrapping glia pseudocolored cyan. **(D)** Wrapping index of *Ddr* loss of function animals is unchanged compared to control. (Unpaired t-test,  $p=0.4378$ ) **(E)** There is a reduction in the number of healthy glutamatergic GFP+ cell bodies in wings from aged *Ddr*<sup>RNAi</sup> knockdown animals compared to age-matched controls. (Two-way ANOVA with Sidak's multiple comparisons. 4dpe  $p=0.9774$ ; 14dpe  $p=0.0007$ ; 28dpe  $p=0.005$ ) **(F)** Representative TEM image of a control nerve at 28 dpe shows normal wrapping/axon separation. **(G)** Representative *Ddr*<sup>RNAi</sup> knockdown nerve at 28 dpe also shows normal wrapping/axon separation. A wrapping glia nucleus is present in this section (asterisk). **(H)** Quantification of axon profiles in 28 dpe control and *Ddr* mutant animals shows a modest but significant reduction in axons in *Ddr* as compared to controls. (Unpaired t-test,  $p=0.0343$ ) **(I)** Representative TEM of a control nerve from a 28 dpe animal shows normal wrapping. **(J)** Representative TEM of a nerve from a 28 dpe *Ddr* mutant animal also shows normal wrapping. **(K)** Quantification of axon profile number in control and *Ddr*<sup>RNAi</sup> glial knockdown nerves show no statistically significant difference in age dependent axon loss in contrast to our findings focusing on VGlut+ neuronal cell bodies by fluorescence (E). (Two-way ANOVA with Sidak's multiple comparisons; 4 dpe  $p=0.9755$ ; 28 dpe  $p=0.2519$ )  
Scale bars: B, C, F, G, I, J = 1  $\mu\text{m}$ ; B' & C' = 600nm

264 knockdown *Ddr* in glia using RNAi. We examined wings at 4, 14, or 28 days post eclosion (dpe)  
265 and counted healthy GFP+ neuronal cell bodies along the wing margin at these timepoints from  
266 control and *Ddr*-RNAi animals to determine if loss of *Ddr* had any impact on long term neuronal  
267 survival. The number of neuronal cell bodies at 4 dpe was the same between control and *Ddr*  
268 knockdown animals suggesting that knockdown of *Ddr* did not affect neurogenesis (Figure 5B).  
269 Despite beginning with the same number of neurons (Figure 5E: 4 dpe mean cell body count =  
270 40.2 vs. 39.7,  $p=0.9774$ ), we found that there were significantly fewer healthy cell bodies in aged  
271 *Ddr*-RNAi wings compared to control at both ages examined (Figure 5E; 14 dpe mean cell body  
272 count 38.9 vs 34.0,  $p=0.0007$ ; 28 dpe mean cell body count 36.5 vs 32.5,  $p=0.005$ , 2-way  
273 ANOVA with Sidak's multiple comparisons). These results indicate that despite not overtly  
274 disrupting glial ensheathment, knockdown of *Ddr* in glial cells negatively impacts long-term  
275 neuron health and survival.

276 To confirm and extend these findings we used TEM to visualize L1 nerves from aged  
277 control and glial *Ddr*-RNAi animals. We collected cross sections from a region in which all  
278 axons should be present so we could compare the total number of axon profiles within the nerve.  
279 To mirror our fluorescent experiments, we used the same genotypes and we first examined wings  
280 at 4 dpe. The number of axon profiles in control nerves at 4 dpe showed little variation and was  
281 indistinguishable from *Ddr*-RNAi (Figure 5H: mean axon profile count  $290.3 \pm 10$  vs  $293.9 \pm 18.3$ ,  
282  $p=0.98$ ). In aged (28 dpe) control and *Ddr* knockdown wing nerves, although wrapping again  
283 appeared normal, there was overall more variability in axon profile counts (Figure 5F-H:  
284 control=  $242.7 \pm 31.02$ , *Ddr*-RNAi =  $226 \pm 46.5$  axon profiles), but there was no significant  
285 difference in axon profile count in the *Ddr*-RNAi condition (Figure 5E-G;  $p=0.25$ , 2-way  
286 ANOVA with Sidak's multiple comparisons. This is in contrast to our findings in the same

287 genotype when we focused exclusively on *VGlut-QF2*+ cell bodies (which marks ~40 cell bodies  
288 out of ~290 cell bodies total in the L1 nerve), We repeated these experiments using *Ddr* mutant  
289 animals and found a small but significant difference in the number of axon profiles (~15% fewer  
290 axons) consistent with the size of our original findings with fluorescent labeling of a  
291 subpopulation of these neurons (Figure 5I-K; control =  $277.9 \pm 17.9$ , *Ddr* =  $235.2 \pm 48.2$ ,  
292  $p=0.022$ , unpaired t-test). Since the effect was stronger in whole animal mutants, this may reflect  
293 insufficient RNAi knockdown, but we cannot rule out that loss of Ddr from neurons, or another  
294 tissue might contribute to this effect, or that only specific subsets of neurons are particularly  
295 vulnerable to Ddr loss. Nevertheless, these data indicate that glial Ddr modulates the long-term  
296 health of sensory neurons.

297

### 298 **Glial Ddr promotes increased axon caliber**

299 Myelination can induce many changes in underlying axons including the redistribution of  
300 axonal proteins and increased axon caliber (Stassart et al., 2018), but whether non-myelinating  
301 ensheathment has similar effects is not known. One striking feature of the ultrastructure of the L1  
302 wing nerve was the presence of a single, prominent, large caliber axon (Figure 5B). This axon is  
303 thus immediately identifiable in every sample, allowing us to directly compare its features across  
304 animals and conditions. A survey of the literature revealed that this axon likely belongs to the  
305 distal twin sensilla of the margin (dTSM) neuron that innervates a campaniform sensillum  
306 (Dickinson and Palka, 1987). A striking but unexpected observation was that the dTSM axon in  
307 *Ddr* mutant and knockdown conditions was significantly smaller than in controls even though it  
308 was still clearly identifiable as the largest axon in the nerve. We quantified axon caliber by  
309 measuring the cross-sectional surface area of this uniquely identifiable axon and comparing

## FIGURE 6

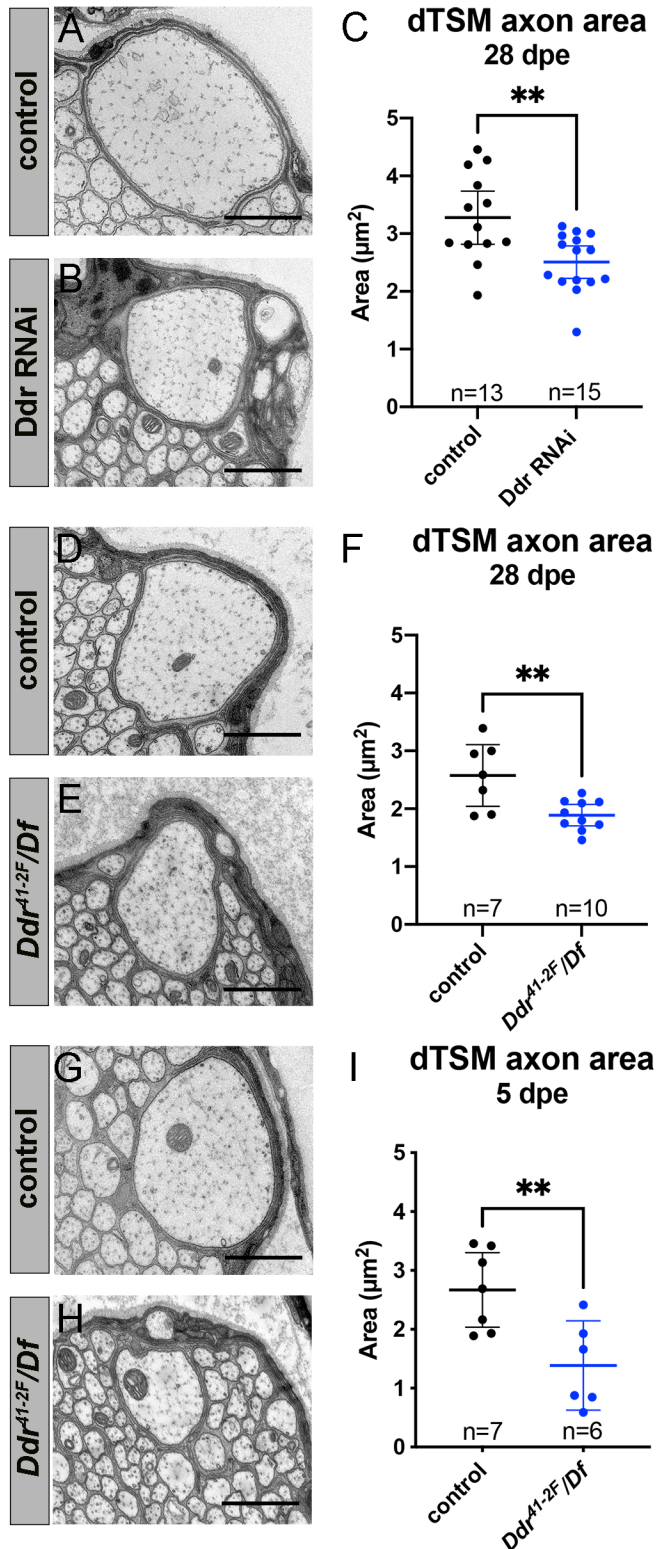

### Figure 6: Ddr is required for normal axon caliber growth

(A-C) Axon caliber of the dTSM axons as measured by the cross-sectional area in TEM images is reduced in 28 dpe *Ddr*<sup>RNAi</sup> nerves compared to age-matched controls. (Unpaired t-test;  $p=0.0037$ ) (D-F) Axon caliber of the dTSM axons as measured by the cross sectional area in TEM images is reduced in 28 dpe *Ddr* loss of function nerves compared to age-matched controls. (Unpaired t-test;  $p=0.0044$ ) (G-I) Axon caliber of the dTSM axons as measured by the cross sectional area in TEM images is already reduced in 5 dpe *Ddr* loss of function nerves compared to age-matched controls suggesting that initial axon maturation is perturbed when Ddr is absent. (Unpaired t-test;  $p=0.0073$ ) Scale bars 1  $\mu\text{m}$ .

310 appropriate controls to *Ddr* mutant or glial *Ddr-RNAi* conditions from our 28 day aged wing  
311 TEM images. We found that in both glial-specific *Ddr*-knockdown and *Ddr* whole animal  
312 mutant nerves the caliber of the dTSM axon was significantly reduced compared to controls,  
313 revealing a role for glial Ddr in modulating axonal caliber (Figure 6A-F).

314 To determine whether reduced caliber is due to reduced growth versus shrinkage, we  
315 examined dTSM caliber in control and *Ddr* mutant wings from 5 dpe and found that the  
316 reduction in size is even greater at this age (Figure 6G-I). dTSM axon caliber is reduced by  
317 ~48% in *Ddr* mutants at 5 dpe (mean area: control = 2.670 $\mu\text{m}^2$  and *Ddr* = 1.387 $\mu\text{m}^2$ ) and ~27%  
318 at 28 dpe (mean area control = 2.575 $\mu\text{m}^2$  and *Ddr* = 1.890 $\mu\text{m}^2$ ). We have examined a small  
319 number of L1 nerves from wild type freshly eclosed flies (<24hours post eclosion) and observed  
320 that axons appear smaller than those from our standard 5 dpe timepoint suggesting that the first  
321 few days post eclosion are an important period of axon growth and maturation (Figure 6—figure  
322 supplement 1). Together these data suggest that the reduced caliber we see in *Ddr* mutants is due  
323 to impaired growth, rather than shrinkage. Since knockdown of Ddr selectively in glia is  
324 sufficient to cause a similar reduction in caliber to what is observed in whole animal mutants  
325 (~23% reduction at 28 dpe in RNAi experiments) our data identifies a cell non-autonomous role  
326 for glial Ddr in the control of axon caliber.

327 The reduced neuronal survival and decreased caliber we observed led us to wonder if we  
328 would observe any behavioral defects in adults as a result of Ddr loss. dTSM likely provides  
329 important proprioceptive feedback during flight, but its exact role in modifying flight behavior  
330 has not been established, making it difficult to directly test the effects of its reduced caliber on  
331 behavior. One well-established, testable behavior in adult flies is the escape reflex mediated by  
332 the giant fiber system. In this response, visual input activates the giant fiber neuron in the CNS,

333 which then activates an interneuron, that innervates a peripheral motor neuron to initiate a  
334 jump/escape response. This circuit is extremely fast and reliable. We reasoned that if the motor  
335 neuron axons in this circuit (the relevant peripheral axons in this circuit) were impaired in some  
336 way, there might be a measurable decrease in the muscle response probability after stimulation  
337 or an increased latency. We tested this reflex electrophysiologically in control and *Ddr* mutant  
338 animals but found no significant differences between the genotypes in either young or 28 dpe  
339 animals (Figure 6—figure supplement 2).

340

### 341 ***Ddr* interacts with *Mp* to promote wrapping in larval nerves**

342 Our data indicate that *Ddr* performs essential roles in wrapping glia development and  
343 function. We next sought to understand the molecular mechanism(s) by which *Ddr* might  
344 mediate these functions. Mammalian *Ddrs* are activated by collagens *in vitro* and are thus  
345 considered non-canonical collagen receptors (Vogel et al., 1997). We wondered if *Drosophila*  
346 *Ddr* also interacts with collagen(s) to mediate its effects on wrapping in the larvae. The  
347 *Drosophila* genome contains 3 collagen genes. One of them, *Multiplexin (Mp)*, was identified as  
348 a potential hit that affected wrapping glia morphology in third instar nerves in our initial screen.  
349 Knockdown of *Mp* using *nrv2-Gal4* caused moderate to severe wrapping defects when analyzed  
350 by confocal microscopy (Figure 7A-B). We studied expression of *Mp* protein in wild type nerves  
351 by using a MiMiC-GFP line in which the endogenous *Mp* protein is tagged with GFP. We  
352 observed punctate GFP expression throughout larval nerves suggesting that *Mp*, a secreted  
353 protein, is expressed by one or more of the cell types within the nerve (Figure 7C).

354 To determine whether *Ddr* and *Mp* might be working in the same genetic pathway to  
355 modulate wrapping in larval nerves, we crossed heterozygous *Ddr* and *Mp* mutants together and

## FIGURE 7

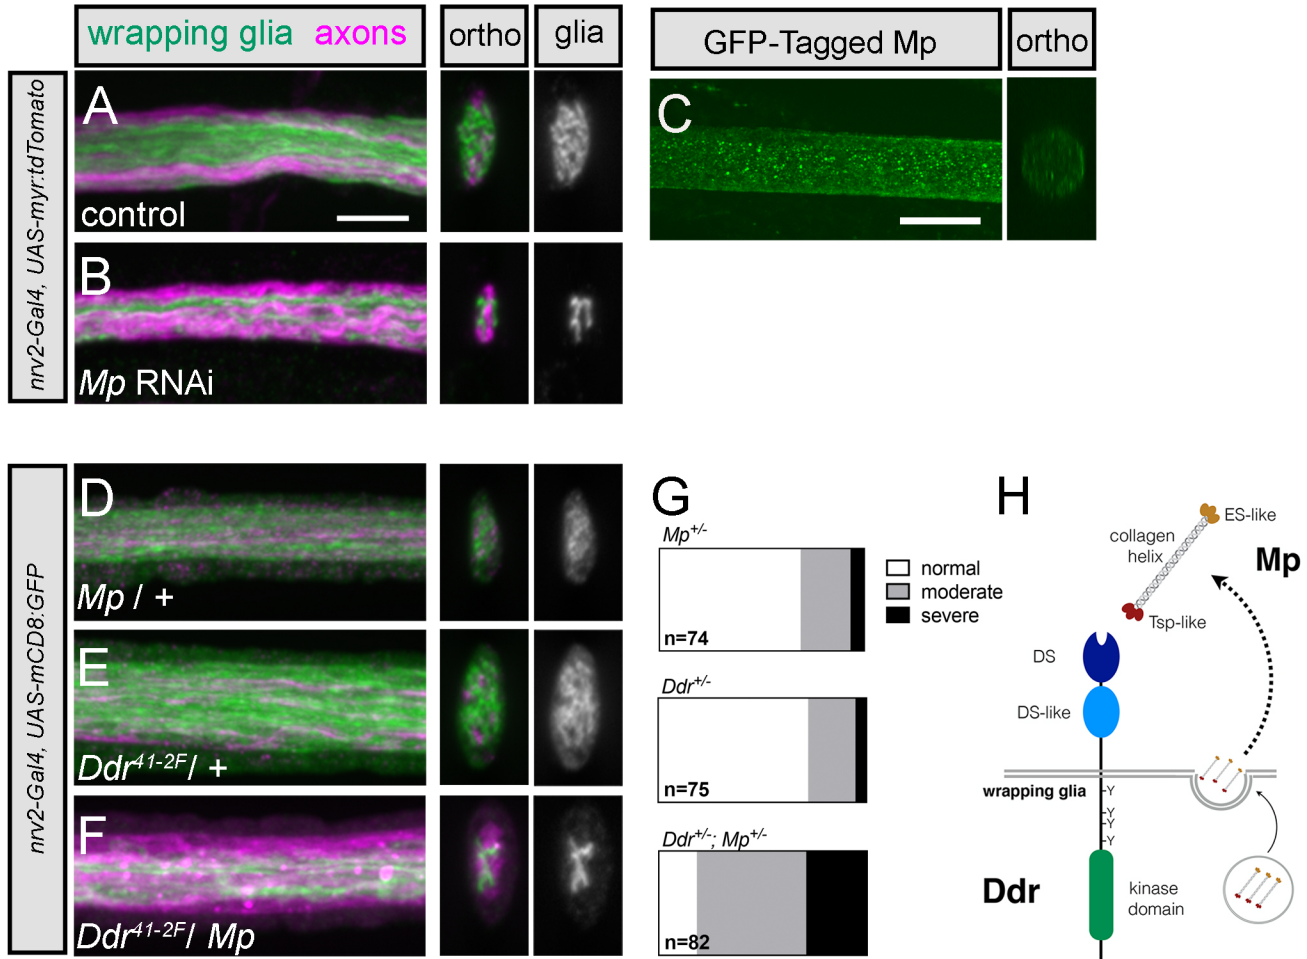

**Figure 7: *Mp* genetically interacts with *Ddr* to promote wrapping in larval nerves**

(A-B) Representative images of control and *Mp* RNAi knockdown in larval nerves. *Nrv2-Gal4* driven tdTomato is pseudocolored green. A subset of axons is labeled with anti-futsch antibody (magenta). Compared to control nerves, RNAi conditions show large areas of the nerve cross section without glia membrane coverage. (C) *Mp*-GFP expression in larval nerves. A MiMiC construct that adds a GFP tag to *Mp* protein is localized throughout larval nerves. (D-F) *Mp* and *Ddr* heterozygous nerves show normal wrapping glia morphology with good glial coverage of the nerve cross section indicating that one copy of each gene is sufficient to promote wrapping. In double heterozygous animals missing just one copy of each gene, however, coverage of the cross section is reduced indicating that wrapping is impaired. (G) Categorical scoring of *Ddr* and *Mp* single and double heterozygotes. n = # of nerves analyzed from 9-11 larvae per condition. (H) Proposed model of *Mp* and *Ddr* interaction. Based on the strong phenotype observed when *Mp* is knocked down specifically in wrapping glia, we hypothesize that wrapping glia secrete *Mp* which can act as autocrine activator of *Ddr* to drive normal wrapping glia morphogenesis.



356 analyzed the double heterozygous progeny for defects in larval wrapping glia morphology.  
357 While animals that were heterozygous for either gene on its own did not show defects in  
358 wrapping glia morphology, we found that the double heterozygous animals exhibited moderate  
359 to severe defects in glial morphology (*Ddr*+: 77% normal morphology; *Mp*+: 72% normal  
360 morphology; *Ddr/Mp*: 18% normal morphology; Figure 7D-G). These data suggest a strong  
361 genetic interaction between the *Ddr* and *Mp* loci and imply they might function in a common  
362 genetic pathway to control wrapping glia morphological development. Given that RNAi  
363 knockdown of *Mp* specifically in wrapping glia is sufficient to cause a wrapping defect, our data  
364 suggest a model in which *Mp* acts in an autocrine fashion to activate *Ddr* and drive downstream  
365 signaling to promote wrapping (Figure 7H).

366

## 367 **Discussion**

368 Non-myelinating ensheathment of axons is a conserved but understudied feature of  
369 peripheral nervous systems. Although this type of multi-axonal ensheathment has been less  
370 studied as compared to myelination, a growing body of evidence indicates it is important for the  
371 health and function of neurons and axons in the periphery. For example, Schwann cell specific  
372 loss of the transmembrane receptor LDL receptor related protein-1 (LRP1) causes both thin  
373 myelin and abnormal Remak bundle structure. These cKO animals also showed a lowered pain  
374 threshold, suggesting that the physiology of nociceptor neurons is impaired when Remak  
375 ensheathment is disrupted (Orita et al., 2013). Disrupting metabolism in SCs causes progressive  
376 axon loss, with small unmyelinated fibers dying first, before myelinated fibers begin to show  
377 signs of degeneration (Beirowski et al., 2014; Viader et al., 2013, 2011). In the fly, disruption of  
378 axonal wrapping leads to uncoordinated behavioral responses that hint at aberrant ephaptic

379 coupling between neighboring axons in nerves when not properly separated (Kottmeier et al.,  
380 2020). Such coupling could cause inappropriate activation of sensory or nociceptive neurons  
381 underlying peripheral neuropathies. Previous studies from our lab have shown that wrapping glia  
382 are required to clear neuronal debris after nerve injury and mediate injury signaling between  
383 injured and intact “bystander” neurons which might be important for functional recovery after  
384 nerve trauma (Hsu et al., 2021; Neukomm et al., 2014). These and other findings suggest that  
385 Remak-type ensheathment and axon-glia signaling of unmyelinated fibers plays a variety of  
386 underappreciated roles in peripheral nerve physiology that contribute to the pathophysiology of a  
387 number of PNS disorders including debilitating peripheral neuropathies and responses to nerve  
388 injury.

389         In order to gain insight into non-myelinating ensheathment, we used the *Drosophila*  
390 peripheral nerves to identify a novel molecular pathway important for the development and  
391 function multi-axonal ensheathment. We generated a new Split-Gal4 intersectional driver to  
392 specifically target wrapping glia for functional and behavioral studies to better understand how  
393 wrapping glia support axon health, physiology and ultimately circuit function. Finally, we  
394 uncovered roles for glia in mediating long-term neuronal survival and driving increased axon  
395 caliber that are separable from overt effects on wrapping, demonstrating that non-myelinating  
396 ensheathing glia perform critical, previously unappreciated, roles in nervous system  
397 development, maintenance, and function.

398

399 *Ddr and Mp regulate wrapping in larval nerves*

400         A main advantage of *Drosophila* is the ability to conduct large scale *in vivo* screens. We  
401 made use of available *UAS-RNAi* libraries to broadly screen for novel regulators of axonal

402 ensheathment in intact nerves. Our morphological screen was sensitive enough to identify genes  
403 previously implicated in wrapping glia development including *vn*, *LamB1*, and *mys*, validating  
404 our approach. Moreover, in the case of *Ddr*, we were able to identify an important novel  
405 regulator of ensheathment that a simple behavioral or lethality screen would have missed in light  
406 of our follow-up behavioral testing. Knockdown of *Ddr* specifically in wrapping glia resulted in  
407 reduced glial membrane coverage in nerve cross sections by fluorescence microscopy. Similar  
408 phenotypes were observed in *Ddr* loss-of-function animals and could be rescued by resupplying  
409 *Ddr* specifically in wrapping glia, confirming the specificity of our RNAi results. TEM clearly  
410 showed that reduced glial membrane coverage at the light level corresponds to decreased axon  
411 wrapping. Unexpectedly, we observed that strong overexpression of *Ddr* using a *5XUAS-Ddr*  
412 construct in a control background caused frequent morphological defects in wrapping glia that  
413 were not observed when using a *1XUAS-Ddr* construct, suggesting that *Ddr* signaling must be  
414 tightly regulated to successfully promote wrapping.

415         Though neither of the vertebrate homologs, *Ddr1* or *Ddr2* has been explicitly implicated  
416 in glial development, several lines of evidence suggests that *Ddr1* may have a conserved role in  
417 vertebrate glial development or function. *Ddr1* is highly expressed in the mouse OL lineage  
418 starting from when the cells begin to associate with axons, is upregulated in newly formed OLs  
419 after cuprizone treatment, and is expressed in both myelinating and Remak Schwann cells  
420 (Franco-Pons et al., 2009, 2006; Gerber et al., 2021; Zhang et al., 2014). Moreover, *Ddr1* is  
421 expressed in human oligodendrocytes and myelin, and variants in the human gene have been  
422 correlated with abnormal white matter and schizophrenia (Gas et al., 2018; Roig et al., 2010).

423         Vertebrate *Ddr1* and *Ddr2* are potently activated by collagens in vitro (Vogel et al.,  
424 1997), prompting us to investigate whether collagens were involved with *Ddr* function in fly

425 nerves. We had discovered that loss of the *Drosophila* collagen Mp disrupted glial morphology  
426 in our initial RNAi screening, and so investigated whether these genes might work together to  
427 promote ensheathment. Together with mammalian Ddrs established roles as collagen receptors,  
428 the strong genetic interaction we observed between *Ddr* and *Mp* is consistent with a model in  
429 which Mp acts as a collagen ligand for Ddr during axonal ensheathment. Our expression data  
430 from the *Mp-GFP* protein trap showed expression throughout the nerve. Although previous  
431 reports indicate that Mp is also expressed in one or both of the outer peripheral glia layers that  
432 extend beyond the nerve to cover NMJ synapses (Wang et al., 2019), the strong ensheathment  
433 defect seen when *Mp* is knocked down exclusively in wrapping glia indicates that wrapping glia  
434 themselves are the primary source of the Mp required for wrapping glia morphogenesis.

435         We hypothesize that Mp can act an autocrine collagen ligand to activate glial Ddr to drive  
436 wrapping in larval nerves (Figure 7H). This parallels developing Schwann cells, which secrete  
437 their own basal lamina, several components of which acts as regulators of their development  
438 including laminins and collagen. For example, laminin-211 serves as a ligand for GPR126 to  
439 promote myelination (Petersen et al., 2015). Mp is the sole *Drosophila* homolog of collagen  
440 types XV/XVIII, containing a central helical collagen region with a cleavable N-terminus  
441 thrombospondin like domain and C-terminal endostatin like domain (Meyer and Moussian, 2009;  
442 Myllyharju and Kivirikko, 2004). Collagen 15a1 and 18a1 are expressed in mouse peripheral  
443 nerves and *coll5a1* mutants have radial sorting defects, suggesting that *Mp*'s role in promoting  
444 axon wrapping is likely conserved (Chen et al., 2015; Gerber et al., 2021; Rasi et al., 2010). In  
445 fact, *Mp* appears to play multiple important roles in nerve biology. Mp secreted by the outer glia  
446 layers acts via its cleaved endostatin domain, which is essential for homeostatic plasticity at  
447 motor neuron synapses (Wang et al., 2019, 2014). How Ddr activation within wrapping glia

448 ultimately drives axon wrapping still remains to be determined, but Ddr joins two other RTKs—  
449 EGFR and FGFR—as important and conserved regulators of axon ensheathment (Franzdóttir et  
450 al., 2009; Kottmeier et al., 2020; Matzat et al., 2015).

451

452 *Wrapping glia are required for normal larval behavior*

453         The *nrv2-Gal4* driver has been the standard method to genetically target wrapping glia in  
454 the field for many years but is imperfect for manipulation of wrapping glia in ablation or  
455 behavioral assays due to its expression in several subtypes of CNS glia. We generated a new  
456 Split-Gal4 intersectional driver that drives exclusively in wrapping glia. This allowed us to  
457 perform precise wrapping glia ablation. We found that genetic ablation of wrapping glia led to  
458 severely impaired larval locomotion, indicating the wrapping glia are essential for basic crawling  
459 circuit function. This phenotype was particularly striking in light of that fact that we did not  
460 observe any clear crawling defect in *Ddr* mutant larvae, even though wrapping was severely  
461 impaired. There are several possible explanations for these observations. First, it may be possible  
462 that non-contact mediated mechanisms, such as one or more secreted factors constitute wrapping  
463 glia's essential contribution to axon health and physiology. Alternatively, perhaps even a small  
464 amount of direct glia-axon contact at any point along the axon length may be sufficient to  
465 support axon function. This would be consistent with the lack of overt behavioral defects in  
466 newly-hatched 1<sup>st</sup> instar larvae, which have poor wrapping compared to later stages (Matzat et  
467 al., 2015; Stork et al., 2008), and even in wild type third instar larvae, in which not every axon is  
468 individually wrapped. This supports the notion that at least in the larvae, wrapping per se may  
469 not be strictly required, but glial presence and/or metabolic support and perhaps at least some  
470 contact is sufficient to support function for the ~5 days of larval life. Our results are similar to

471 what has been recently reported (Kottmeier et al., 2020) using a different approach to target  
472 wrapping glia for ablation, where only minor behavioral defects were observed when disrupting  
473 the FGFR signaling but profound crawling defects were seen upon ablation. Together these data  
474 support the conclusion that even limited wrapping or simply some degree of glia-axon contact is  
475 sufficient to support axon survival and nerve function compared to no glia at all.

476

477 *Loss of Ddr impairs long-term neuronal survival*

478 To better study the long-term functional effects of Ddr loss in wrapping glia, we turned to  
479 an adult nerve. Previous studies of oligodendrocytes and Schwann cells have found that  
480 impairing glial function can result in seemingly normal wrapping and circuit function in young  
481 animals, with deficits only appearing when the system is stressed or aged (Beirowski et al., 2014;  
482 Lappe-Siefke et al., 2003; Saab et al., 2016; Zöllner et al., 2008), and studying wrapping in the  
483 adult allows for aging and maintenance studies that the short larval period precludes. Adult  
484 peripheral nerves are encased in a transparent but hard cuticle that allows for live-imaging but  
485 makes fixation challenging. Because of the resolution limits of light microscopy, we established  
486 a reliable method to study their ultrastructure using TEM. We found that the wrapping of axons  
487 by glia in the adult wing nerve is strikingly different from the larva, as all axons appear to be  
488 separated and individually ensheathed by glial membranes. To our surprise, wrapping was not  
489 obviously impaired in adult nerves of *Ddr* knockdown or mutant animals. Whether this is  
490 because it causes only a transient delay during pupal development, or is simply not required for  
491 adult wrapping glia morphogenesis remains unclear. In larval wrapping glia, there are 3 RTKs  
492 (EGFR, the FGFR *heartless*, and now *Ddr*) that are each required for normal ensheathment, and  
493 thus cannot fully compensate for one another (Kottmeier et al., 2020; Matzat et al., 2015). One

494 difference between larval and adult wrapping glia is the size of each cell. One larval wrapping  
495 glia cell covers the majority of the nerve length from where it exits the VNC to the territory of  
496 the second wrapping glia which has its cell body where nerve enters the muscle field. This means  
497 that the wrapping glia cell must undergo tremendous growth to both keep up with longitudinal  
498 growth as the animal grows and elongates the nerve, as well as radial growth to separate axons.  
499 A single cell can end up covering from ~750um-2.5mm of nerve length depending on the  
500 segment. In the wing nerve, there are ~15 wrapping glia along the region of the L1 nerve we  
501 analyze, which is ~400um long. Perhaps in the larval system the cell is pushed to its growth  
502 limits and any perturbation in pro-wrapping signaling has a strong effect of morphology, whereas  
503 in the adult nerve the system is robust and redundant enough to withstand perturbations of single  
504 genes.

505         Despite no obvious wrapping effect, however, we found that loss of *Ddr* did affect the  
506 sensory neurons in the nerve as animals naturally aged. The uncoupling of neuron health from  
507 overt effects on myelination has been demonstrated previously. For example, *Cnp1* mutant mice  
508 show severe age-dependent neurodegeneration although they have grossly normal myelin with  
509 only subtle changes in myelin ultrastructure revealed by special fixation techniques (Lappe-  
510 Siefke et al., 2003; Snaidero et al., 2017). Similarly, loss of PLP results in axon degeneration  
511 despite having normal myelin with only subtle ultrastructural defects (Garbern et al., 2002;  
512 Griffiths et al., 1998; Klugmann et al., 1997). We found that the number of VGlu<sup>+</sup> neurons was  
513 reduced in aged wings of *Ddr* knock down animals, indicating that glial *Ddr* is important for  
514 long-term neuronal survival. When we analyzed *Ddr* whole animal mutants by TEM we found a  
515 small but significant reduction in axon profile number, which should correspond to the number  
516 of living neurons. The effects were modest, and together with the increased variability observed

517 suggests to us that absence of Ddr signaling increases the susceptibility of subpopulations of  
518 neurons to insult or injury that may underlie age-related degeneration rather than outright  
519 causing them to die. While we cannot rule out the possibility that loss of Ddr from neurons or  
520 epithelial cells contributes to the effect we see in the whole animal mutant experiments, taken  
521 together our data support a role for Ddr in mediating axon-glia signaling that contributes to the  
522 long-term health of peripheral neurons.

523

#### 524 *Glial Ddr regulates axon caliber*

525         Myelination can directly affect the structure and function of the axons they wrap,  
526 including controlling caliber. In general, myelination increases caliber. For example,  
527 dysmyelinated *Trembler* mice have reduced axon calibers compared to controls (Waegh et al.,  
528 1992) and in the PNS caliber along a single axon can vary with reduced caliber at points without  
529 direct myelin contact, such as nodes of Ranvier (Hsieh et al., 1994). Axon caliber is an important  
530 determinant of conduction velocity but varies widely between neuronal subtypes, so achieving  
531 and maintaining appropriate caliber for each axon during development is likely to be critical for  
532 proper circuit function. How non-myelinating ensheathment might impact axon caliber has not  
533 been as clearly established. Here, we find that glial Ddr promotes increased axon caliber of a  
534 non-myelinated axon. We focused on the dTSM axon, which can be reliably identified across  
535 animals, so we could directly compare caliber between conditions. The reductions we observed  
536 in axon caliber were similar between *Ddr* mutants and when Ddr was specifically lost from glia  
537 cells, supporting a non-cell autonomous role for glial Ddr in regulating axon caliber. The effect  
538 is considerable—nearly a 50% reduction in axon caliber at 5 dpe. We hypothesize that by this



539 time point, wildtype dTSM axons have reached their mature caliber, as it is comparable between  
540 5 dpe and 28 dpe in comparable genetic backgrounds. In *Ddr* mutants, however, we observe that  
541 the relative size compared to controls changes over time, suggesting that in *Ddr* mutants (or  
542 knockdowns) the axon continues to increase its caliber, perhaps in an effort to achieve the  
543 optimal size, though the axons still remain ~25% smaller than wild type axons at 28 dpe.

544 Two proteins, MAG, which acts to increase caliber of myelinated axons (Yin et al.,  
545 1998), and CMTM6, which restricts caliber of myelinated and unmyelinated axons (Eichel et al.,  
546 2020) are the only proteins reported to cell non-autonomously affect caliber of vertebrate axons.  
547 In the fly, a shift in the average size of axons in larval nerves is observed when wrapping glia are  
548 absent or severely disrupted supporting a general role for wrapping in promoting axon size  
549 (Kottmeier et al., 2020). Interestingly, we show that *Ddr* is required for increased axon caliber  
550 even when wrapping appears intact supporting a direct role for glial *Ddr* in promoting increased  
551 caliber. The exact molecular mechanism by which *Ddr* may promote increased caliber size  
552 remains unclear. The control of axon caliber, generally, is not well understood, with few studies  
553 looking at either cell autonomous or non-autonomous control of caliber. Genes involved in the  
554 general regulation of cell size have been implicated as cell autonomous determinants. For  
555 example, in the fly, S6 kinase signaling is a positive regulator of motorneuron size, including  
556 axon caliber, though the exact mechanisms that determine final caliber remain unknown (Cheng  
557 et al., 2011). In mammalian axons, it is believed that the phosphorylation state of neurofilaments  
558 and microtubules ultimately determines their spacing to control caliber (Yin et al., 1998). It  
559 seems unlikely that *glial* *Ddr* can directly phosphorylate *axonal* microtubules, so determining  
560 how *Ddr* activity in glia influences the axonal cytoskeleton to control caliber growth is an  
561 important next step. Our giant fiber assay did not reveal any clear deficits in escape reflex

562 circuitry, but this circuitry mediates an extremely robust all-or-none escape response that does  
563 not depend on proprioceptive feedback along long peripherally wrapped axons. A 25-50%  
564 reduction in caliber would be predicted to impact conduction velocity along the dTSM axon and  
565 given that campaniform sensilla provide essential rapid sensory feedback to fine tune movement,  
566 it will be of interest to test conduction velocity and/or flight behavior directly in *Ddr* mutant  
567 animals to see how the proprioceptive circuit might be affected.

568         Taken together, our studies identify Ddr as an important regulator of wrapping glia  
569 development and function in the fly, with distinct roles in larval and adult wrapping glia. Ddr is  
570 essential for the normal morphological development of axon wrapping in the larvae, and later it  
571 mediates important axon-glia communication that controls axon caliber growth and affects  
572 neuronal health and survival. Given its expression pattern in vertebrate oligodendrocytes and  
573 Schwann cells, it seems likely that one or more of these essential functions is conserved in  
574 vertebrates. Further study into how Ddr functions in both fly and vertebrate glia promises to  
575 increase our understanding of axon ensheathment in health and disease.

576

## 577 **Methods**

### 578 ***Drosophila* genetics**

579         *Drosophila melanogaster* were raised according to standard laboratory conditions. Larval  
580 RNAi experiments, including controls, were conducted at 29°C to increase expression of the  
581 UAS-RNAi constructs. All other experimental crosses and aging experiments were conducted at  
582 25°C. A full list of all fly strains used in this study can be found as a table in the Supplemental

583 Methods. Fly strains generated for this study include *Ddr*<sup>41-2F</sup>, *Ddr*<sup>13-1M</sup>, *WG-SplitGal4*, *5XUAS-*  
584 *Ddr* and *1XUAS-Ddr*. Full details on their construction are also in the Supplemental Methods.

585

## 586 **Immunohistochemistry and Confocal Analysis**

587 For confocal fluorescent imaging, larvae were filleted on sylgard plates in room  
588 temperature (RT) PBS and fixed on a shaker in 4% paraformaldehyde (Electron Microscopy  
589 Sciences, EMS) in PBS for 20 minutes. After washing with PBS and PBST (0.3% Triton-X),  
590 larvae were incubated in primary antibodies overnight at 4°C with gentle agitation on a shaker.  
591 After washing in PBST at RT on a shaker, secondary antibodies were added and incubated  
592 overnight at 4°C on a shaker, shielded from light. After washes in PBST, samples were mounted  
593 on glass slides using Vectashield (Vector Labs). The following primary antibodies were used in  
594 this study: chicken  $\alpha$ -GFP (1:1000, Abcam, ab13970); rabbit  $\alpha$ -DsRed (1:600, Clontech,  
595 #632496); rat  $\alpha$ -mCherry (1:2000, Invitrogen, #16D7); mouse  $\alpha$ -futsch (22C10, 1:500, DSHB);  
596 mouse  $\alpha$ -Repo (1:100, DSHB); goat  $\alpha$ -HRP pre-conjugated to Alexa488, CY3, or CY5 (1:100,  
597 Jackson Immuno Research); rabbit  $\alpha$ -Oaz (1:5000, this study, see details below). Primary  
598 antibodies were detected with the appropriate donkey secondary antibody conjugated to DyLight  
599 488, Alexa488, Cy3, Rhodamine Red-X, CY5, or DyLight 405 reconstituted per the  
600 manufacturer's instructions and use at final dilutions of 1:250 (Jackson Immuno Research).  
601 Phalloidin-iFluor 647 and 405 were used at 1:2500 (Abcam).

602 Confocal images were obtained on either an Innovative Imaging Innovations (3i)  
603 spinning-disk confocal microscope equipped with a Yokogawa CSX-X1 scan head and  
604 Hamamatsu camera with SlideBook software (3i) or on a Zeiss spinning disk confocal  
605 microscope equipped with a Yokogawa CSX-X1 scan head and Hamamatsu camera with Zen

606 software. Images were obtained with 10x air, 40x 1.3NA Oil, or 63x 1.4NA Oil objectives.  
607 Confocal stacks taken to analyze wrapping glia morphology in nerve cross sections were taken  
608 with the 63x objective, using the recommended optimal slice size of 0.27 microns.

609 To score wrapping glia morphology, images were obtained from regions ~200 microns  
610 from the tip of the VNC (to roughly correspond to the TEM analysis location). At 63x  
611 magnification ~100um of nerve length could be analyzed in an image. Orthogonal sections were  
612 visualized using SlideBook or Zen software and the cross section of each nerve was examined  
613 over the length in the captured image. Morphology was scored categorically as being “normal,”  
614 having “moderate” defects in nerve coverage, or having “severe” defects in nerve coverage.  
615 Nerves were not scored if the Z axis of a particular nerve was too compressed to visualize  
616 morphology well. Representative orthogonal views were exported to prepare figures. See Figure  
617 2—figure supplement 1 for images and descriptions of each category. The number of larvae and  
618 nerves scored for each quantified genotype is included in the text or appropriate Figure legend.

619

## 620 **Electron microscopy**

621 Third instar larvae were manually processed for TEM as dissected fillets, using standard  
622 TEM processing procedures. *Drosophila* wings were processed using microwave-assisted  
623 fixation with a protocol adapted from (Cunningham and Monk, 2018; Czopka and Lyons, 2011)  
624 protocols for zebrafish larvae, with the main differences being the elimination of all 10 minute  
625 RT “hold” steps. After fixation and embedding in Embed-812, 70nm sections were collected on  
626 200 mesh copper grids (larvae) or 100 mesh Formvar film coated grids (wings), counterstained  
627 with UA and lead citrate and imaged on a Tecnai T12 electron microscope operating at 80kV or

628 120kV accelerating voltage equipped with an AMT digital camera and software. Full details of  
629 fixation and processing are available in the Supplemental Methods.

630

### 631 **Aging assay and live imaging of wings**

632       Animals of appropriate genotypes were crossed at 25°C. Correct progeny were selected  
633 using visible markers and aged in small groups in cornmeal agar vials for the indicated number  
634 of days at 25°C. Flies were transferred to fresh food vials every 3-7 days. On the appropriate day  
635 (4, 14, or 28 days after collection), flies were anesthetized and one wing was removed from each  
636 animal using fine dissection scissors (Fine Science Tools). Wings used for fluorescence imaging  
637 were mounted in Halocarbon oil 27 (Sigma) on glass slides for live imaging as described in  
638 (Neukomm et al., 2014). For the neuronal survival assay, wings were inspected for tears and  
639 injuries along the L1 vein at 63x with transmitted light and only wings with no visible physical  
640 damage were assessed further. GFP+ cell bodies were visualized and counted using a Zeiss  
641 Spinning Disk confocal system (Axio Examiner equipped with a Yokogawa spinning disk,  
642 Hamatsu camera, and Zen software) using a 63xNA1.4 oil objective. Cells were counted as intact  
643 if they had a clear nucleus and dendrite or were considered dead if they were shrunken and the  
644 dendrite or nucleus were not clearly visible. Wings to be analyzed by TEM were immediately  
645 placed in fixative and processed as described in the Supplemental Methods.

646

### 647 **Larval Tracking**

648 Larval crawling behavior was analyzed using the frustrated total internal reflection imaging  
649 method and FIMTrack software (Risse et al., 2017). Briefly, larvae were washed briefly in  
650 ddH<sub>2</sub>O and kept on agar plates prior to testing. Approximately 5 larvae of the same genotype

651 were placed near the center of a 0.8% agar surface positioned above an IR camera using a  
652 paintbrush. Behavior was recorded at RT at 10 frames/second for 1 minute. Videos were  
653 analyzed using FIMTrack software to extract data about individual larva. Crawling paths for  
654 each larva were automatically generated by FIMTrack and information of total distance travelled  
655 for each larva was exported to Excel and converted from pixels to cm before being analyzed  
656 using GraphPad PRISM software. Only larvae that were successfully tracked for the full minute  
657 were included in the analysis.

658

### 659 **Giant Fiber Assay**

660 This assay was performed essentially as described in (Allen and Godenschwege, 2010).  
661 Flies of the appropriate genotype and age are mounted ventral side down under a microscope.  
662 Stimulating electrodes were placed through the eyes to the brain and a recording electrode was  
663 placed in the DLM muscle. 100 or 200 Hz stimulation trains were applied and responses were  
664 recorded in the DLM muscle. The number of responses and the latency of the first response were  
665 quantified. Data were analyzed with the GraphPad Prism, using either Mann-Whitney's test (for  
666 non-parametric data) or Welch's t-test (for parametric data) to determine statistical differences.  
667

### 668 **Analysis and Statistics**

669 TEM image analysis was performed in FIJI/ImageJ using an AMT plugin to import  
670 image metadata. Wrapping index (WI) was quantified as described in Matzat et al, 2015.  
671 Briefly, the Cell Counter plugin was used to manually tally the total number of axons and then  
672 manually tally the number of bundles or singly wrapped axons. WI was then computed for each  
673 nerve as: # of singly wrapped + # axon bundles/Total # of axons, expressed as a percentage.

674 Axon counts in wing nerves were also performed manually with the Cell Counter plugin in FIJI.  
675 dTSM cross sectional area was performed using the polygon selection tool to manually trace the  
676 circumference of the dTSM axon and then using the Measure Tool to obtain the cross-sectional  
677 area that had been outlined. Nerves were excluded from an analysis if knife marks, resin folds, or  
678 debris blocked the feature(s) needing to be measured or if the section angle was too far from  
679 perpendicular resulting in elongated and blurry axonal profiles. For larval experiments, both  
680 male and female larvae were used unless the genetics of a specific experiment only allowed for  
681 one sex to be used (e.g. transgene on the X chromosome coming from a male parent). For adult  
682 experiments only female flies (wings) were used. Wing size and the number and type of sensory  
683 neurons present in the wing are sexually dimorphic, which necessitated using a single sex to  
684 compare axon number and caliber. Females were selected because their wings are slightly larger  
685 and thus easier to handle, and this facilitates genetic experiments that involve genes and/or  
686 transgenes on the X chromosome.

687         Statistical analysis was performed using GraphPad Prism software. The appropriate  
688 statistical test was determined based on the experimental design and how many conditions were  
689 being compared. Details on the exact sample sizes and statistical tests used are included in the  
690 corresponding Results section and/or Figure.

691

692

693

694

695 Author Contributions:

696

697 M.M.C.: Conceptualization, Methodology, Formal Analysis, Investigation, Data Curation,  
698 Writing-Original Draft, Visualization, Project Administration, Funding Acquisition

699 A.P.L.: Methodology, Formal Analysis, Investigation, Data curation, Writing-Review and  
700 Editing, Visualization  
701 J.Q.H.: Methodology, Investigation, Writing-Review and editing  
702 A.E.S.: Investigation  
703 F.J.B-G.: Investigation, Formal Analysis, Writing-Review and Editing, Visualization  
704 G. W.D.: Resources, Writing-Review and Editing, Funding Acquisition  
705 S.A.A.: Resources, Writing-Review and Editing, Funding Acquisition  
706 M.R.F.: Conceptualization, Resources, Generation of the anti-Oaz antibody, Writing-Review and  
707 Editing, Project Administration, Supervision, Funding Acquisition  
708

## 709 Acknowledgements

710 We are grateful to Dr. Christian Klambt, Dr. Joshua Dubnau, the Bloomington Stock Center, and  
711 the Vienna Drosophila Resource Center for providing fly stocks. We would like to acknowledge  
712 FlyBase.org for being an invaluable research tool for *Drosophila* scientists (Larkin et al., 2020).  
713 Anti-futsch (22C10), anti-Repo (8D12), and anti-Elav (7E8A10) monoclonal antibodies  
714 developed by Drs. Seymour Benzer, Corey Goodman, & Gerald Rubin (respectively) were  
715 obtained from the Developmental Studies Hybridoma Bank created by the NICHD of the NIH  
716 and maintained at The University of Iowa, Department of Biology, Iowa City, IA 52242. We  
717 thank Dr. Michael Brodsky for assistance with CRISPR-Cas9 mediated mutagenesis. We thank  
718 Dr. Lara Strittmatter and the staff of the University of Massachusetts Medical Center Electron  
719 Microscopy Facility; Dr. Robert Kayton and Dr. Lisa Vecchiarelli of the OHSU Electron  
720 Microscopy Facility; and Dr. Deborah Hegarty for their expertise and assistance with TEM  
721 protocol development and equipment. We are indebted to Dr. Kelly Monk and the Monk lab for  
722 TEM advice and generous sharing of their microwave tissue processing equipment. We thank  
723 Rachel Bradshaw for her help with the RNAi screen and Alex Larson for her assistance with  
724 TEM prep work. Finally, we thank all members of the Freeman lab for their advice and feedback  
725 throughout this project. This work was supported by NINDS P30 NS061800 (SAA) and NINDS  
726 R01NS112215 & R01059991(MRF). MRF was an investigator with the Howard Hughes  
727 Medical Institute during a portion of this study.  
728



729 References

- 730  
731
- 732 Allen MJ, Godenschwege TA. 2010. Electrophysiological Recordings from the *Drosophila* Giant  
733 Fiber System (GFS). *Cold Spring Harb Protoc* 2010:pdb.prot5453. doi:10.1101/pdb.prot5453
- 734 Barros CS, Nguyen T, Spencer KSR, Nishiyama A, Colognato H, Müller U. 2009. Beta1  
735 integrins are required for normal CNS myelination and promote AKT-dependent myelin  
736 outgrowth. *Development (Cambridge, England)* 136:2717–2724. doi:10.1242/dev.038679
- 737 Beirowski B, Babetto E, Golden JP, Chen Y-J, Yang K, Gross RW, Patti GJ, Milbrandt J. 2014.  
738 Metabolic regulator LKB1 is crucial for Schwann cell-mediated axon maintenance. *Nature*  
739 *neuroscience* 1–15. doi:10.1038/nn.3809
- 740 Chen P, Cescon M, Bonaldo P. 2015. The Role of Collagens in Peripheral Nerve Myelination  
741 and Function. *Molecular neurobiology* 52:216–225. doi:10.1007/s12035-014-8862-y
- 742 Cheng L, Locke C, Davis GW. 2011. S6 kinase localizes to the presynaptic active zone and  
743 functions with PDK1 to control synapse development. *J Cell Biology* 194:921–935.  
744 doi:10.1083/jcb.201101042
- 745 Coutinho-Budd JC, Sheehan AE, Freeman MR. 2017. The secreted neurotrophin Spätzle 3  
746 promotes glial morphogenesis and supports neuronal survival and function. *Gene Dev*  
747 31:2023–2038. doi:10.1101/gad.305888.117
- 748 Cunningham RL, Monk KR. 2018. Schwann Cells, Methods and Protocols 385–400.  
749 doi:10.1007/978-1-4939-7649-2\_26
- 750 Czopka T, Lyons DA. 2011. Chapter 2 Dissecting Mechanisms of Myelinated Axon Formation  
751 Using Zebrafish. *Methods Cell Biol* 105:25–62. doi:10.1016/b978-0-12-381320-6.00002-3
- 752 Dickinson M, Palka J. 1987. Physiological properties, time of development, and central  
753 projection are correlated in the wing mechanoreceptors of *Drosophila*. *J Neurosci* 7:4201–  
754 4208. doi:10.1523/jneurosci.07-12-04201.1987
- 755 Eichel MA, Gargareta V-I, D’Este E, Fledrich R, Kungl T, Buscham TJ, Lüders KA, Miracle C,  
756 Jung RB, Distler U, Kusch K, Möbius W, Hülsmann S, Tenzer S, Nave K-A, Werner HB.  
757 2020. CMTM6 expressed on the adaxonal Schwann cell surface restricts axonal diameters in  
758 peripheral nerves. *Nat Commun* 11:4514. doi:10.1038/s41467-020-18172-7
- 759 Feltri ML, Porta DG, Previtali SC, Nodari A, Migliavacca B, Casseti A, Littlewood-Evans A,  
760 Reichardt LF, Messing A, Quattrini A, Mueller U, Wrabetz L. 2002. Conditional disruption of  
761 beta 1 integrin in Schwann cells impedes interactions with axons. *The Journal of cell biology*  
762 156:199–209. doi:10.1083/jcb.200109021

- 763 Franco-Pons N, Tomàs J, Roig B, Auladell C, Martorell L, Vilella E. 2009. Discoidin domain  
764 receptor 1, a tyrosine kinase receptor, is upregulated in an experimental model of  
765 remyelination and during oligodendrocyte differentiation in vitro. *Journal of molecular*  
766 *neuroscience* : MN 38:2–11. doi:10.1007/s12031-008-9151-x
- 767 Franco-Pons N, Virgos C, Vogel WF, Ureña JM, Soriano E, Rio JA del, Vilella E. 2006.  
768 Expression of discoidin domain receptor 1 during mouse brain development follows the  
769 progress of myelination. *Neuroscience* 140:463–475. doi:10.1016/j.neuroscience.2006.02.033
- 770 Franzdóttir SR, Engelen D, Yuva-Aydemir Y, Schmidt I, Aho A, Klämbt C. 2009. Switch in  
771 FGF signalling initiates glial differentiation in the Drosophila eye. *Nature* 460:758–761.  
772 doi:10.1038/nature08167
- 773 Furusho M, Dupree JL, Bryant M, Bansal R. 2009. Disruption of fibroblast growth factor  
774 receptor signaling in nonmyelinating Schwann cells causes sensory axonal neuropathy and  
775 impairment of thermal pain sensitivity. *The Journal of neuroscience : the official journal of*  
776 *the Society for Neuroscience* 29:1608–1614. doi:10.1523/jneurosci.5615-08.2009
- 777 Garbern JY, Yool DA, Moore GJ, Wilds IB, Faulk MW, Klugmann M, Nave K, Siermans EA,  
778 Knaap MS van der, Bird TD, Shy ME, Kamholz JA, Griffiths IR. 2002. Patients lacking the  
779 major CNS myelin protein, proteolipid protein 1, develop length-dependent axonal  
780 degeneration in the absence of demyelination and inflammation. *Brain* 125:551–561.  
781 doi:10.1093/brain/awf043
- 782 Gas C, Canales-Rodríguez EJ, Radua J, Abasolo N, Cortés MJ, Salvadó E, Muntané G, Alemán-  
783 Gómez Y, Julià T, Marsal S, Sanjuan J, Guitart M, Costas J, Martorell L, Pomarol-Clotet E,  
784 Vilella E. 2018. Discoidin domain receptor 1 gene variants are associated with decreased  
785 white matter fractional anisotropy and decreased processing speed in schizophrenia. *J*  
786 *Psychiatr Res* 110:74–82. doi:10.1016/j.jpsychires.2018.12.021
- 787 Gerber D, Pereira JA, Gerber J, Tan G, Dimitrieva S, Yángüez E, Suter U. 2021. Transcriptional  
788 profiling of mouse peripheral nerves to the single-cell level to build a sciatic nerve Atlas  
789 (SNAT). *Elife* 10:e58591. doi:10.7554/elife.58591
- 790 Ghosh A, Kling T, Snaidero N, Sampaio JL, Shevchenko A, Gras H, Geurten B, Göpfert MC,  
791 Schulz JB, Voigt A, Simons M, Perrimon N. 2013. A Global In Vivo Drosophila RNAi  
792 Screen Identifies a Key Role of Ceramide Phosphoethanolamine for Glial Ensheathment of  
793 Axons. *PLoS genetics* 9:e1003980. doi:10.1371/journal.pgen.1003980.s012
- 794 Gohl DM, Silies MA, Gao XJ, Bhalerao S, Luongo FJ, Lin C-C, Potter CJ, Clandinin TR. 2011.  
795 A versatile in vivo system for directed dissection of gene expression patterns. *Nature methods*  
796 8:231–237.
- 797 Griffin JW, Thompson WJ. 2008. Biology and pathology of nonmyelinating Schwann cells. *Glia*  
798 56:1518–1531. doi:10.1002/glia.20778

- 799 Griffiths I, Klugmann M, Anderson T, Yool D, Thomson C, Schwab MH, Schneider A,  
800 Zimmermann F, McCulloch M, Nadon N, Nave KA. 1998. Axonal swellings and  
801 degeneration in mice lacking the major proteolipid of myelin. *Science (New York, NY)*  
802 280:1610–1613.
- 803 Hilchen CM von, Bustos AE, Giangrande A, Technau GM, Altenhein B. 2013. Predetermined  
804 embryonic glial cells form the distinct glial sheaths of the *Drosophila* peripheral nervous  
805 system. *Development (Cambridge, England)*. doi:10.1242/dev.093245
- 806 Hsieh S, Kidd G, Crawford T, Xu Z, Lin W, Trapp B, Cleveland D, Griffin J. 1994. Regional  
807 modulation of neurofilament organization by myelination in normal axons. *J Neurosci*  
808 14:6392–6401. doi:10.1523/jneurosci.14-11-06392.1994
- 809 Hsu J-M, Kang Y, Corty MM, Mathieson D, Peters OM, Freeman MR. 2021. Injury-Induced  
810 Inhibition of Bystander Neurons Requires dSarm and Signaling from Glia. *Neuron* 109:473-  
811 487.e5. doi:10.1016/j.neuron.2020.11.012
- 812 Klugmann M, Schwab MH, Pühlhofer A, Schneider A, Zimmermann F, Griffiths IR, Nave K-A.  
813 1997. Assembly of CNS Myelin in the Absence of Proteolipid Protein. *Neuron* 18:59–70.  
814 doi:10.1016/s0896-6273(01)80046-5
- 815 Kottmeier R, Bittern J, Schoofs A, Scheiwe F, Matzat T, Pankratz M, Klämbt C. 2020. Wrapping  
816 glia regulates neuronal signaling speed and precision in the peripheral nervous system of  
817 *Drosophila*. *Nat Commun* 11:4491. doi:10.1038/s41467-020-18291-1
- 818 Lappe-Siefke C, Goebbels S, Gravel M, Nicksch E, Lee J, Braun PE, Griffiths IR, Nave K-A.  
819 2003. Disruption of *Cnp1* uncouples oligodendroglial functions in axonal support and  
820 myelination. *Nature genetics* 33:366–374. doi:10.1038/ng1095
- 821 Larkin A, Marygold SJ, Antonazzo G, Attrill H, dos Santos G, Garapati PV, Goodman JL,  
822 Gramates LS, Millburn G, Strelets VB, Tabone CJ, Thurmond J, Consortium F, Perrimon N,  
823 Gelbart SR, Agapite J, Broll K, Crosby M, Santos G dos, Falls K, Gramates LS, Jenkins V,  
824 Longden I, Matthews B, Sutherland C, Tabone CJ, Zhou P, Zytkevich M, Brown N,  
825 Antonazzo G, Attrill H, Garapati P, Larkin A, Marygold S, McLachlan A, Millburn G,  
826 Pilgrim C, Ozturk-Colak A, Trovisco V, Kaufman T, Calvi B, Goodman J, Strelets V,  
827 Thurmond J, Cripps R, Lovato T. 2020. FlyBase: updates to the *Drosophila melanogaster*  
828 knowledge base. *Nucleic Acids Res* 49:D899–D907. doi:10.1093/nar/gkaa1026
- 829 Luan H, Peabody NC, Vinson CR, White BH. 2006. Refined spatial manipulation of neuronal  
830 function by combinatorial restriction of transgene expression. *Neuron* 52:425–436.  
831 doi:10.1016/j.neuron.2006.08.028
- 832 Lyons DA, Pogoda H-M, Voas MG, Woods IG, Diamond B, Nix R, Arana N, Jacobs J, Talbot  
833 WS. 2005. *erbb3* and *erbb2* are essential for schwann cell migration and myelination in  
834 zebrafish. *Current biology : CB* 15:513–524. doi:10.1016/j.cub.2005.02.030

- 835 Matzat T, Sieglitz F, Kottmeier R, Babatz F, Engelen D, Klämbt C. 2015. Axonal wrapping in  
836 the *Drosophila* PNS is controlled by glia-derived neuregulin homolog *Vein*. *Development*  
837 (*Cambridge, England*) 142:1336–1345. doi:10.1242/dev.116616
- 838 Meyer F, Moussian B. 2009. *Drosophila* multiplexin (Dmp) modulates motor axon pathfinding  
839 accuracy. *Development, growth & differentiation* 51:483–498. doi:10.1111/j.1440-  
840 169x.2009.01111.x
- 841 Michailov GV, Sereda MW, Brinkmann BG, Fischer TM, Haug B, Birchmeier C, Role L, Lai C,  
842 Schwab MH, Nave K-A. 2004. Axonal Neuregulin-1 Regulates Myelin Sheath Thickness.  
843 *Science* 304:700–703. doi:10.1126/science.1095862
- 844 Monk KR, Feltri ML, Taveggia C. 2015. New insights on schwann cell development. *Glia*.  
845 doi:10.1002/glia.22852
- 846 Mukherjee C, Kling T, Russo B, Miebach K, Kess E, Schifferer M, Pedro LD, Weikert U, Fard  
847 MK, Kannaiyan N, Rossner M, Aicher M-L, Goebbels S, Nave K-A, Krämer-Albers E-M,  
848 Schneider A, Simons M. 2020. Oligodendrocytes Provide Antioxidant Defense Function for  
849 Neurons by Secreting Ferritin Heavy Chain. *Cell Metab* 32:259-272.e10.  
850 doi:10.1016/j.cmet.2020.05.019
- 851 Myllyharju J, Kivirikko KI. 2004. Collagens, modifying enzymes and their mutations in humans,  
852 flies and worms. *Trends Genet* 20:33–43. doi:10.1016/j.tig.2003.11.004
- 853 Nave K-A. 2010. Myelination and support of axonal integrity by glia. *Nature* 468:244–252.  
854 doi:10.1038/nature09614
- 855 Neukomm LJ, Burdett TC, Gonzalez MA, Züchner S, Freeman MR. 2014. Rapid in vivo forward  
856 genetic approach for identifying axon death genes in *Drosophila*. *Proceedings of the National*  
857 *Academy of Sciences* 111:9965–9970. doi:10.1073/pnas.1406230111
- 858 Ochoa J, Mair WG. 1969. The normal sural nerve in man. I. Ultrastructure and numbers of fibres  
859 and cells. *Acta neuropathologica* 13:197–216.
- 860 Orita S, Henry K, Mantuano E, Yamauchi K, Corato AD, Ishikawa T, Feltri ML, Wrabetz L,  
861 Gaultier A, Pollack M, Ellisman M, Takahashi K, Gonias SL, Campana WM. 2013. Schwann  
862 cell LRP1 regulates remak bundle ultrastructure and axonal interactions to prevent  
863 neuropathic pain. *The Journal of neuroscience : the official journal of the Society for*  
864 *Neuroscience* 33:5590–5602. doi:10.1523/jneurosci.3342-12.2013
- 865 Pereira JA, Benninger Y, Baumann R, Gonçalves AF, Özçelik M, Thurnherr T, Tricaud N,  
866 Meijer D, Fässler R, Suter U, Relvas JB. 2009. Integrin-linked kinase is required for radial  
867 sorting of axons and Schwann cell remyelination in the peripheral nervous system. *The*  
868 *Journal of cell biology* 185:147–161. doi:10.1083/jcb.200809008

- 869 Petersen SC, Luo R, Liebscher I, Giera S, Jeong S-J, Mogha A, Ghidinelli M, Feltri ML,  
870 Schöneberg T, Piao X, Monk KR. 2015. The adhesion GPCR GPR126 has distinct, domain-  
871 dependent functions in Schwann cell development mediated by interaction with laminin-211.  
872 *Neuron* 85:755–769. doi:10.1016/j.neuron.2014.12.057
- 873 Petley-Ragan LM, Ardiel EL, Rankin CH, Auld VJ. 2016. Accumulation of Laminin Monomers  
874 in Drosophila Glia Leads to Glial Endoplasmic Reticulum Stress and Disrupted Larval  
875 Locomotion. *Journal of Neuroscience* 36:1151–1164. doi:10.1523/jneurosci.1797-15.2016
- 876 Potter CJ, Tasic B, Russler EV, Liang L, Luo L. 2010. The Q system: a repressible binary system  
877 for transgene expression, lineage tracing, and mosaic analysis. *Cell* 141:536–548.  
878 doi:10.1016/j.cell.2010.02.025
- 879 Rasi K, Hurskainen M, Kallio M, Stavén S, Sormunen R, Heape AM, Avila RL, Kirschner D,  
880 Muona A, Tolonen U, Tanila H, Huhtala P, Soininen R, Pihlajaniemi T. 2010. Lack of  
881 collagen XV impairs peripheral nerve maturation and, when combined with laminin-411  
882 deficiency, leads to basement membrane abnormalities and sensorimotor dysfunction. *The*  
883 *Journal of neuroscience : the official journal of the Society for Neuroscience* 30:14490–  
884 14501. doi:10.1523/jneurosci.2644-10.2010
- 885 Risse B, Berh D, Otto N, Klämbt C, Jiang X. 2017. FIMTrack: An open source tracking and  
886 locomotion analysis software for small animals. *PLoS computational biology* 13:e1005530.  
887 doi:10.1371/journal.pcbi.1005530
- 888 Roig B, Franco-Pons N, Martorell L, Tomàs J, Vogel WF, Vilella E. 2010. Expression of the  
889 tyrosine kinase discoidin domain receptor 1 (DDR1) in human central nervous system myelin.  
890 *Brain research* 1336:22–29. doi:10.1016/j.brainres.2010.03.099
- 891 Saab AS, Tzvetavona ID, Trevisiol A, Baltan S, Dibaj P, Kusch K, Möbius W, Goetze B, Jahn  
892 HM, Huang W, Steffens H, Schomburg ED, Pérez-Samartín A, Pérez-Cerdá F, Bakhtiari D,  
893 Matute C, Löwel S, Griesinger C, Hirrlinger J, Kirchhoff F, Nave K-A. 2016.  
894 Oligodendroglial NMDA Receptors Regulate Glucose Import and Axonal Energy  
895 Metabolism. *Neuron* 91:119–132. doi:10.1016/j.neuron.2016.05.016
- 896 Schmalbruch H. 1986. Fiber composition of the rat sciatic nerve. *The Anatomical record* 215:71–  
897 81. doi:10.1002/ar.1092150111
- 898 Snaidero N, Velte C, Myllykoski M, Raasakka A, Ignatev A, Werner HB, Erwig MS, Möbius W,  
899 Kursula P, Nave K-A, Simons M. 2017. Antagonistic Functions of MBP and CNP Establish  
900 Cytosolic Channels in CNS Myelin. *Cell Reports* 18:314–323.  
901 doi:10.1016/j.celrep.2016.12.053
- 902 Stassart RM, Fledrich R, Velanac V, Brinkmann BG, Schwab MH, Meijer D, Sereda MW, Nave  
903 K-A. 2013. A role for Schwann cell-derived neuregulin-1 in remyelination. *Nature*  
904 *neuroscience* 16:48–54. doi:10.1038/nn.3281

- 905 Stassart RM, Möbius W, Nave K-A, Edgar JM. 2018. The Axon-Myelin Unit in Development  
906 and Degenerative Disease. *Front Neurosci-switz* 12:467. doi:10.3389/fnins.2018.00467
- 907 Stork T, Engelen D, Krudewig A, Silies M, Bainton RJ, Klämbt C. 2008. Organization and  
908 function of the blood-brain barrier in *Drosophila*. *The Journal of neuroscience : the official*  
909 *journal of the Society for Neuroscience* 28:587–597. doi:10.1523/jneurosci.4367-07.2008
- 910 Taveggia C, Zanazzi G, Petrylak A, Yano H, Rosenbluth J, Einheber S, Xu X, Esper RM, Loeb  
911 JA, Shrager P, Chao MV, Falls DL, Role L, Salzer JL. 2005. Neuregulin-1 type III determines  
912 the ensheathment fate of axons. *Neuron* 47:681–694. doi:10.1016/j.neuron.2005.08.017
- 913 Viader A, Golden JP, Baloh RH, Schmidt RE, Hunter DA, Milbrandt J. 2011. Schwann Cell  
914 Mitochondrial Metabolism Supports Long-Term Axonal Survival and Peripheral Nerve  
915 Function. *J Neurosci* 31:10128–10140. doi:10.1523/jneurosci.0884-11.2011
- 916 Viader A, Sasaki Y, Kim S, Strickland A, Workman CS, Yang K, Gross RW, Milbrandt J. 2013.  
917 Aberrant Schwann cell lipid metabolism linked to mitochondrial deficits leads to axon  
918 degeneration and neuropathy. *Neuron* 77:886–898. doi:10.1016/j.neuron.2013.01.012
- 919 Vogel W, Gish GD, Alves F, Pawson T. 1997. The discoidin domain receptor tyrosine kinases  
920 are activated by collagen. *Molecular cell* 1:13–23.
- 921 Waegh SM de, Lee VM-Y, Brady ST. 1992. Local modulation of neurofilament  
922 phosphorylation, axonal caliber, and slow axonal transport by myelinating Schwann cells.  
923 *Cell* 68:451–463. doi:10.1016/0092-8674(92)90183-d
- 924 Wang T, Hauswirth AG, Tong A, Dickman DK, Davis GW. 2014. Endostatin Is a Trans-  
925 Synaptic Signal for Homeostatic Synaptic Plasticity. *Neuron* 83:616–629.  
926 doi:10.1016/j.neuron.2014.07.003
- 927 Wang T, Morency DT, Harris N, Davis GW. 2019. Epigenetic Signaling in Glia Controls  
928 Presynaptic Homeostatic Plasticity. *Neuron* 105:491-505.e3.  
929 doi:10.1016/j.neuron.2019.10.041
- 930 Xie X, Auld VJ. 2011. Integrins are necessary for the development and maintenance of the glial  
931 layers in the *Drosophila* peripheral nerve. *Development (Cambridge, England)* 138:3813–  
932 3822. doi:10.1242/dev.064816
- 933 Yin X, Crawford TO, Griffin JW, Tu P h, Lee VM, Li C, Roder J, Trapp BD. 1998. Myelin-  
934 associated glycoprotein is a myelin signal that modulates the caliber of myelinated axons. *J*  
935 *Neurosci* 18:1953–1962. doi:10.1523/jneurosci.18-06-01953.1998
- 936 Yu W-M, Yu H, Chen Z-L, Strickland S. 2009. Disruption of laminin in the peripheral nervous  
937 system impedes nonmyelinating Schwann cell development and impairs nociceptive sensory  
938 function. *Glia* 57:850–859. doi:10.1002/glia.20811

- 939 Zhang Y, Chen K, Sloan SA, Bennett ML, Scholze AR, O’Keeffe S, Phatnani HP, Guarnieri P,  
940 Caneda C, Ruderisch N, Deng S, Liddelow SA, Zhang C, Daneman R, Maniatis T, Barres  
941 BA, Wu JQ. 2014. An RNA-Sequencing Transcriptome and Splicing Database of Glia,  
942 Neurons, and Vascular Cells of the Cerebral Cortex. *The Journal of neuroscience : the official*  
943 *journal of the Society for Neuroscience* 34:11929–11947. doi:10.1523/jneurosci.1860-  
944 14.2014
- 945 Zöller I, Meixner M, Hartmann D, Büssow H, Meyer R, Gieselmann V, Eckhardt M. 2008.  
946 Absence of 2-Hydroxylated Sphingolipids Is Compatible with Normal Neural Development  
947 But Causes Late-Onset Axon and Myelin Sheath Degeneration. *J Neurosci* 28:9741–9754.  
948 doi:10.1523/jneurosci.0458-08.2008
- 949
